# 1 **Microbiome of the Black Sea water column analyzed by genome** 2 **centric metagenomics**

3  
4 **Pedro J. Cabello-Yeves<sup>1</sup>, Cristiana Callieri<sup>2</sup>, Antonio Picazo<sup>3</sup>, Maliheh Mehrshad<sup>4</sup>, Jose**  
5 **M. Haro-Moreno<sup>1</sup>, Juan J. Roda-Garcia<sup>1</sup>, Nina Dzhembekova<sup>5</sup>, Violeta Slabakova<sup>5</sup>,**  
6 **Nataliya Slabakova<sup>5</sup>, Snejana Moncheva<sup>5</sup> and Francisco Rodriguez-Valera<sup>1,6\*</sup>**

7 <sup>1</sup> Evolutionary Genomics Group, Departamento de Producción Vegetal y Microbiología, Universidad Miguel,  
8 Hernández, San Juan de Alicante, Alicante, Spain

9 <sup>2</sup> National Research Council (CNR), Institute of Water Research (IRSA), Verbania, Italy

10 <sup>3</sup> Cavanilles Institute of Biodiversity and Evolutionary Biology, University of Valencia, E-46980 Paterna,  
11 Valencia, Spain.

12 <sup>4</sup>Department of Aquatic Sciences and Assessment, Swedish University of Agricultural Sciences, Uppsala, Lennart  
13 Hjelms väg 9, 75651 Uppsala, Sweden

14 <sup>5</sup> Institute of Oceanology “Fridtjof Nansen” – Bulgarian Academy of Sciences, Varna, Bulgaria

15 <sup>6</sup> Moscow Institute of Physics and Technology, Dolgoprudny 141701, Russia

16 \*Correspondence: frvalera@umh.es

## 18 *Abstract*

19  
20 **Background:** The Black Sea is the largest brackish water body in the world, although it is  
21 connected to the Mediterranean Sea and presents an upper water layer similar to some regions  
22 of the former albeit with lower salinity and (mostly) temperature. In spite of its well-known  
23 hydrology and physico chemistry, this enormous water mass remains poorly studied at the  
24 microbial genomics level.

25 **Results:** We have sampled its different water masses and analyzed the microbiome by classic  
26 and genome-resolved metagenomics generating a large number of metagenome-assembled

27 genomes (MAGs) from them. The oxic zone presents many similarities to the global ocean  
28 while the euxinic water mass has similarities to other similar aquatic environments of marine  
29 or freshwater (meromictic monimolimnion strata) origin. The MAG collection represents very  
30 well the different types of metabolisms expected in this kind of environments and includes  
31 Cyanobacteria (*Synechococcus*), photoheterotrophs (largely with marine relatives),  
32 facultative/microaerophilic microbes again largely marine, chemolithotrophs (N and S  
33 oxidizers) and a large number of anaerobes, mostly sulfate reducers but also a few methanogens  
34 and a large number of “dark matter” streamlined genomes of largely unpredictable ecology.

35 **Conclusions:** The Black Sea presents a mixture of similarities to other water bodies. The photic  
36 zone has many microbes in common with that of the Mediterranean with the relevant exception  
37 of the absence of *Prochlorococcus*. The chemocline already presents very different  
38 characteristics with many examples of chemolithotrophic metabolism (*Thioglobus*) and  
39 facultatively anaerobic microbes. Finally the euxinic anaerobic zone presents, as expected,  
40 features in common with the bottom of meromictic lakes with a massive dominance of sulfate  
41 reduction as energy generating metabolism and a small but detectable methanogenesis. We are  
42 adding critical information about this unique and important ecosystem and its microbiome.

43

#### 44 ***Keywords***

45 Black Sea microbiota, genome-resolved metagenomics, pycnocline, euxinic waters

46

#### 47 ***Background***

48

49 The Black Sea is the inner arm of the Mediterranean basin. Nearly severed from the rest by the  
50 tectonic movement of the African plate, it is only connected to the rest of the Mediterranean  
51 Sea by the narrow but deep strain of the Bosphorus. The Black Sea has a positive hydric balance

52 i.e. receives more freshwater than lost by evaporation and hence contains less salt (from 0.73  
53 % in epipelagic to 2.2 % in meso-bathypelagic waters) than the Mediterranean (3.8 %) proper.  
54 In addition, the large watershed and riverine inputs lead to a richer nutrient status (meso-  
55 eutrophic) and permanent stratification with a colder, more saline deep water mass that remains  
56 anaerobic and largely euxinic below 150-200 m [1–3]. All these properties make the Black Sea  
57 a unique brackish-marine environment. Its great depth (average depth 1253 m with a maximum  
58 of 2212 m) makes this system much more stable than other brackish inland water bodies like  
59 the Baltic Sea in which the anaerobic compartment is only a recent development due to  
60 anthropic impact [4].

61

62 Although a few studies have been carried out by metagenomics and metagenome-assembled  
63 genomes (MAGs) reconstruction, the information available in databases about this unique  
64 environment is scarce. A recent study showed for the first time the microbial structure of the  
65 sulfidic waters of 1000 m depth [5], mainly dominated by sulfate reducers (Desulfobacterota  
66 and Chloroflexi classes such as Dehalococcoidia or Anaerolinea), associated DOM degraders  
67 (Marinimicrobia, Cloacimonetes) and streamlined uncultured taxa such as Omnitrophica,  
68 Parcubacteria or Woesearchaeota. At the genome level, Black Sea microbes remain largely  
69 unknown. Only 10 MAGs have been studied from the abovementioned study [5], 179 MAGs  
70 from 50-2000 m have been recently deposited into Genbank (PRJNA649215) and a couple of  
71 works have described various *Synechococcus* phylotypes [6,7]. Most recently, members of  
72 widespread clades such as SUP05 (*Ca. Thioglobus* spp), *Sulfurimonas* bacteria, and  
73 uncultivated SAR324 and Marinimicrobia have been studied from this and other dysoxic  
74 environments [8]. Here, we present a genome resolved metagenomic study of different depths  
75 in the Black Sea adding a total of 359 high-quality MAGs. The epipelagic and DCM strata  
76 show an overall marine-brackish community composition with predominance of microbes

77 similar to the Mediterranean and the Caspian Seas [9,10]. The anaerobic compartment, that  
78 accounts for up to 80% of the total sea volume, had a much more exotic microbiota including  
79 various members of the microbial “dark matter”.

80

## 81 ***Results and discussion***

82

### 83 **Analysis of Metagenomic raw reads**

84 We have generated metagenomic datasets from a Black Sea depth profile. Samples were  
85 collected along the Bulgarian coast at two stations (Fig. S1A). Sampling depth was guided by  
86 the physicochemical measurements (Fig. S1B) to cover representative temperature, oxygen,  
87 and chlorophyll-a values (Additional File 1). Thus, for St. 307, with the maximum depth of  
88 1100 m, samples came from the near-surface at 5 m depth, the deep chlorophyll maximum  
89 (DCM) at 30 m, a sample from the redoxcline/pycnocline at 150 m and finally a sample at 750  
90 m depth, corresponding to the euxinic water layer. Additionally, we collected a single near-  
91 surface sample (5 m) closer to the shore at station 301 with a maximum depth of 22.5 m. For  
92 each depth, we performed a first unassembled read analysis to obtain a rough taxonomic profile  
93 based on metagenomic 16S rRNA gene fragments against the SILVA database [11] (Fig. 1A)  
94 and the main predicted metabolic functions assessed by the SEED subsystems [12] (Fig. 1B).

95

96 The oxic strata, surface and DCM, presented, at this rough level, very similar taxonomic  
97 composition (Fig. 1A). Alphaproteobacteria (orders SAR11, SAR116, Rhodobacterales and  
98 Rhodospirillales), Gammaproteobacteria (mostly orders SAR86 and Pseudomonadales), and  
99 picocyanobacteria (order Synechococcales) were the most abundant groups, representing > 70  
100 % of total microbial biomass (assessed by total 16S rRNA classification). It must be  
101 highlighted the complete absence of the genus *Prochlorococcus* in all our Black Sea samples.

102 The predominant subsystems of the oxic layer (Fig. 1B) were, as expected, associated with  
103 phototrophic lifestyles such as those from Synechococcales (photosystems/phycobilisomes) or  
104 photoheterotrophy with type-1 rhodopsin pumps (typical of SAR11, SAR86 or  
105 Flavobacteriales). In addition, ammonia was the preferred N source.

106

107 The taxonomic composition changed dramatically as we reached oxygen extinction in the  
108 pycnocline (150 m), where various taxa and microbial lifestyles coexisted, with a prevalence  
109 of anaerobic N and S related subsystems (Fig. 1B). Marinimicrobia (ca. 30 % of 16S rRNA  
110 assigned reads) and Gammaproteobacteria (ca. 20 %) were the dominant taxa of the redoxcline  
111 (Fig. 1A). Chemolithotrophs and anaerobes, such as SUP05 (*Ca. Thioglobus* spp.),  
112 Nitrosopumilaceae (aerobic archaeal ammonia oxidizers), Campylobacterota (dissimilatory  
113 nitrate reducer), Marinimicrobia (fermenters and hydrogen metabolizers), Nitrospirota (nitrite  
114 oxidizers) (N fixers), Chlorobi (anoxygenic photosynthesizers), Desulfobacterota (sulfate-  
115 reducers) and various associated streamlined microbes such as Patescibacteria and  
116 Nanoarchaeota appeared here.

117

118 The euxinic waters at 750 m showed an increase in fermentation, hydrogen metabolism,  
119 anaerobic respiratory reductases or methanogenesis pathways (Fig. 1B). Overall, we observed  
120 an increase in sulfate reducers (Desulfobacterota), Dehalococcoidia/Anaerolineae  
121 Chloroflexota and a huge diversity of accompanying microbiota providing hydrogen and  
122 fermentation by-products that conformed a syntrophic network fueling the sulfate reducers at  
123 the redox end. There were representatives from Omnitrophota and Kiritimatiellae (both  
124 classified inside Verrucomicrobiota according to SILVA standards [11], although  
125 Omnitrophota is classified as a single phylum according to GTDB [13]), Phycisphaerae  
126 Planctomycetota, Marinimicrobia, Nanoarchaeota, Patescibacteria, and Cloacimonadota.

127 Finally, Halobacterota (Syntrophoarchaeia) and Crenarchaeota (Bathyarchaeia) minor  
128 representation (< 2 % of total microbial biomass assessed by 16S rRNA) showed that  
129 methanogenesis coexisted with sulfate reduction in these euxinic waters if in much more reduce  
130 fraction.

131

### 132 **MAGs recovered from the different samples**

133 Automated binning followed by manual curation of generated bins allowed the recovery of 359  
134 MAGs with > 50 % completeness and < 5 % contamination. Detailed stats of these MAGs are  
135 described in Table 1 (MAGs from oxic samples) and Table 2 (redoxcline/anoxic MAGs) and  
136 in individual MAG detail in Additional File 2. Genomes are also showed in an estimated  
137 genome size versus GC content plot in Fig. S2. The taxonomic nomenclature used in this work  
138 was based on GTDB (ref). To estimate the binning efficiency, we mapped the reads of each  
139 metagenome against the MAGs obtained for each sample at the thresholds of > 95 % of identity  
140 and > 50 bp of alignment lengths. The percentages of reads mapped to the MAGs varied  
141 between samples, being maximum in the redoxcline (50 %) and minimum in the euxinic sample  
142 (33 %). With regard to the oxic samples, the MAG recovery efficiency was ca. 50 % of the  
143 total reads mapped with the MAGs from the coastal epipelagic sample (BS301-5 m), 42 % for  
144 the off-shore epipelagic sample (BS307-5 m) and 34 % for the DCM sample (BS307-30 m).  
145 These recovery values are in the range of what was previously obtained for other aquatic  
146 environments [14].

147

148 A Distance-based redundancy analysis (dbRDA) was conducted to statistically assess the main  
149 differences between different Black Sea strata (Fig. 2). To make such analysis we used the  
150 physicochemical measurements (Additional File 1), the metabolic abundance of each SEED  
151 subsystem (Fig. 1D) and the relative abundance of each microbial species retrieved as MAG

152 and assessed with reads per Kb of Genome per Gb of metagenome (RPKGs), showed in  
153 Additional File 3.

154

### 155 **MAGs from the epipelagic and DCM oxic strata**

156

157 As expected, the statistical analysis conducted with the dbRDA (Fig. 2) grouped together the  
158 environmental variables of Temperature (T), dissolved oxygen (DO) or ammonia with  
159 photo(hetero)trophic lifestyles from well-known marine and brackish groups such as SAR11,  
160 SAR116 and Rhodospirillales (Alphaproteobacteria), SAR86 (Gammaproteobacteria),  
161 Thermoplasmatota (former marine group II Euryarchaeota), Synechococcales (*Synechococcus*)  
162 and Actinomarinales (Actinobacteria). As noted above, we must highlight a complete absence  
163 of *Prochlorococcus* spp., contrasted with a high abundance of various *Synechococcus* MAGs  
164 that affiliated with the marine clades I, III, IV, VI and WPC1 including isolates (KORDI-49,  
165 BL107, CC9902, WH 8016, WH 7805/7803, WH 8103/8102) [15]. The main Actinobacteria  
166 MAGs retrieved presented relatively small genome sizes (1.2-2.2 Mb), among which we must  
167 highlight the presence of 5 novel Actinomarinales (BS301-5m-G7, BS307-5m-G2, BS30m-  
168 G2/G3/G4) and a group of Ilumatobacteraceae genomes related to Caspian MAGs (Casp-  
169 actino5) [10]. The major SAR11 Alphaproteobacterial MAGs were eight novel  
170 Pelagibacterales that affiliated with the recently described groups Ia.1, IIaB/1 and IIIa [16].  
171 Remarkably, we obtained three novel MAGs from the order Rickettsiales. Another relevant  
172 Alphaproteobacteria clade from which we obtained MAGs was SAR116, with six MAGs  
173 affiliated to *Puniceispirillum* genus and five more were only classified as representatives of the  
174 family Puniceispirillaceae. A remarkable family that has shown a high abundance in Black Sea  
175 oxic waters is Flavobacteriaceae (23 MAGs), a group that was commonly detected in the  
176 Mediterranean [9] and the Baltic Seas [17]. In fact, various MAGs were related at GTDB genus

177 level with MED-G11, MED-G14 MAGs and at the species level (ANI > 95 %) with MED-G20  
178 Mediterranean Sea MAGs. Two MAGs also showed their closest relatives at the GTDB family  
179 level with Baltic Sea MAGs BACL11 and at the species level with BACL21. We also found  
180 five representatives from the clade OM43 (family Methylophilaceae) affiliating at the genus  
181 level to BACL14 Baltic Sea MAGs. Eleven MAGs belonged to the cosmopolitan  
182 Gammaproteobacteria SAR86, so far only classified at this order level. Other  
183 Gammaproteobacteria that co-occurred in these samples were MAGs with similarity to  
184 *Luminiphilus* (11 MAGs) and *Litoricola* (3 MAGs) genera. Another relevant taxon from  
185 marine systems was the former marine group-II Euryarchaeota (Thermoplasmatota according  
186 to GTDB taxonomy). We retrieved six genomes affiliating to the family Poseidoniaceae and  
187 other six to the genus Poseidonia. Only one genome was obtained affiliating to  
188 Thalassoarchaeaceae. Finally, three ultra-small (1 Mb of estimated genome size)  
189 Marinimicrobia MAGs were obtained from oxic metagenomes, which so far are classified by  
190 the GTDB as genus *Marinisoma*.

191

## 192 **Black Sea pycnocline MAGS**

193

194 The redoxcline of the Black Sea presented the most metabolically diverse set of pathways  
195 among all analyzed samples (Fig. 2A). The main environmental variables that statistically  
196 grouped with the pycnocline were total nitrogen (TN) and nitrate, which were clearly  
197 associated with the different N cycle pathways that completed its biogeochemical cycle in this  
198 layer. The highest abundance of N pathways corresponded with denitrification (nitrogen gas as  
199 the final product), nitrate/nitrite ammonification and dissimilatory nitrate reduction (with  
200 ammonium as the final product), but the N cycle was also completed with ammonia oxidation  
201 and N fixation pathways detected both in total reads and MAGs (see below). Nonetheless,



202 various other metabolisms coexisted in this thin layer where oxygen is extinguished. We  
203 noticed the presence of anoxygenic photosynthesis, exemplified by MAG BS150m-G13  
204 showing > 99 % of ANI with *Chlorobium phaeobacteroides*, a green sulfur bacterium (GSB)  
205 originally isolated from the Black Sea [18] (GCA\_000020545.1), that was undergoing a nearly  
206 monoclonal bloom (Fig. S3).

207

208 Chemoautotrophy was observed in *Thioglobus* sp. BS150m-G29 and G33 MAGs, both of  
209 which are novel representatives of the SUP05 clade which performs a wide variety of  
210 metabolisms including S oxidation and C fixation and with only 80 % of ANI with its closest  
211 relative (*Ca. Thioglobus autotrophicus* EF1) [19]. It appears that this is a case of a single  
212 species (recruiting at > 95 % of nucleotide identity) abundant (> 70 RPKG, Fig. S4) in the  
213 Black Sea redoxcline. Methane oxidation (*Methylobacter* sp. BS150m-G31) and ammonia  
214 oxidation were also key metabolisms observed in this layer (*Nitrosopumilus* spp. BS150m-  
215 G38/39/40). Nitrite oxidation was detected in Nitrospinaceae BS150m-G45.

216

217 Denitrification was frequently detected among pycnocline MAGs, although complete  
218 denitrification including the last step involving conversion of nitrous oxide into nitrogen gas  
219 (*nosZ* gene) was seen only in five MAGs (Marinimicrobia BS150m-G46/G47/G71,  
220 unclassified Alphaproteobacteria BS150m-G7/G9, Rhodospirillales BS150m-G4/G10,  
221 *Sulfurimonas* sp. BS150m-G26 and unclassified Gammaproteobacteria BS150m-G28/30/32).  
222 Dissimilatory nitrate reduction to ammonium (*nrfAH* genes) was far more restricted and found  
223 in Marinimicrobia BS150m-G46, Campylobacterota (*Sulfurimonas* sp. BS150m-G26) or  
224 Bacteroidales BS150m-G15. Nitrate reduction through *nirB* gene was much more widely  
225 detected including in all Alphaproteobacteria MAGs and various Gammaproteobacteria

226 members. N fixation (*nifDK* dinitrogenase subunits) was detected in only two MAGs  
227 (*Chlorobium phaeobacteroides* and Nitrospirota, BS150m-G55/G56 respectively).

228

229 Dissimilatory sulfate reduction and oxidation (*dsrAB* genes) showed up already in this sample  
230 in various genomes such as Desulfobacterota, Nitrospirota MAGs, Planctomycetota  
231 (Pirellulaceae BS150m-G36) (already mentioned above), Chloroflexota (Anaerolineales  
232 BS150m-G18), Alphaproteobacteria (Rhodospirillales BS150m-G3/G4/10/G11), *Chlorobium*  
233 *phaeobacteroides* MAG and Gammaproteobacteria (*Ca. Thioglobus* and  
234 Gammaproteobacteria BS150m-G28 MAGs). It must be noted that, among the main features  
235 of this habitat, there was the simultaneous activity of sulfate-reducing and sulfide-oxidizing  
236 microbes forming part of the same ecological niche, a process known as cryptic sulfur cycle  
237 [20]. However, low O<sub>2</sub> concentrations (0.87 mg/L) and low ratio (0.16) of peroxidase/recA  
238 genes (1.5 in oxic datasets) clearly demonstrate the microaerophilic/anoxic nature of this  
239 habitat.

240

241 We also compared our pycnocline dataset with previously available metagenomes from the  
242 redoxcline from Cariaco Basin (Venezuela) [21] (Fig. S5). Overall, it seems that  
243 Marinisomatota/Marinimicrobia and Gammaproteobacteria chemolithotrophic groups are the  
244 most abundant key players of these two marine redoxclines, accounting for more than 50 % of  
245 total microbial biomass (Fig. S5A). However, it must be noted that only a few species retrieved  
246 as MAGs from the Black Sea were detected in such a similar habitat (Fig. S5C). Among them,  
247 two chemolithotrophic Gammaproteobacterial representatives (*Ca. Thioglobus* and a novel  
248 species BS150m-G30 classified only at the order level as o\_\_GCA-2400775 by GTDB), sulfate  
249 reducers (Desulfatiglandales), denitrifying and hydrogen-producing Marinimicrobia (three  
250 species) and one Actinobacteria (a novel species from the marine MedAcidi-G1 group). Apart

251 from their metabolic potential fitting with microbial lifestyles from pycnocline layers, these  
252 species could play key roles in other marine redoxclines and oxygen minimum zones (OMZs),  
253 as their detection in two largely separated biomes with different salinities (ca. 2 % in the Black  
254 Sea and 3.5 % in the Cariaco Basin) indicate a widespread distribution in oxygen-depleted  
255 marine niches.

256

### 257 **Euxinic Black Sea MAGs and the “microbial dark matter”**

258

259 The main environmental variables grouping with the mesopelagic sample of 750 m were PO<sub>4</sub>  
260 and Si, both of which are solubilized in anoxic layers and diffuse from the sediment layer.  
261 Salinity also increased up to 2.2 % in these euxinic waters. There is the expected predominance  
262 of sulfate reduction pathways, as carried out by Desulfobacterota MAG representatives  
263 (Desulfatiglandales BS750m-G47-G51 and BS750m-G54/G56, Desulfobacterales BS750m-  
264 G52/G53/G55), which perform the dissimilatory sulfate reduction pathway (*dsr* genes).

265

266 Methanogenesis was very diluted in these waters but still detectable, albeit we found the  
267 complete pathway in MAG *Ca. Syntrophoarchaeum* BS750m-G82 and most of the genes  
268 except for the key enzyme, Methyl-coenzyme M reductase (*mcr*) in Bathyarchaeota BS750m-  
269 G27/G28 MAGs as well. The latter showed various mixed-acid fermentation pathways  
270 including the formation of H<sub>2</sub> and CO<sub>2</sub> (via the formate hydrogenlyase), formate (pyruvate-  
271 formate lyase), alcohol (alcohol dehydrogenase) or lactate (lactate dehydrogenase). It must be  
272 noted the potential capability of performing reverse methanogenesis, or anaerobic methane  
273 oxidation (ANME) by the abovementioned archaeon (MAG *Ca. Syntrophoarchaeum* BS750-  
274 G82). Heterodisulfide reductase genes (*HdrABC*), which are involved in the last step of  
275 methanogenesis by reducing CoB-CoM heterodisulfide, were detected in Bathyarchaeota and

276 *Syntrophoarchaeum* MAGs. However, these genes were also found in Cloacimonadota,  
277 candidate division KSB1, *Ca.* Aminicenantes, Omnitrophica, Desulfobacterota,  
278 Planctomycetes, and Chloroflexi MAGs as well as in the unassembled reads (being completely  
279 absent from oxic datasets), suggesting that these electron transfer complexes are not exclusive  
280 of methanogens. As seen by the dbRDA, we also noted a global predominance of mixed-acid  
281 fermentation pathways (with ethanol, lactate, acetate, formate or CO<sub>2</sub>/H<sub>2</sub> as products) and  
282 hydrogen uptake hydrogenases that couple with sulfate, fumarate, CO<sub>2</sub> or nitrate reduction,  
283 thus conforming a complex syntrophic network of microbes. This networking of syntrophic  
284 microbes (considered here as interspecies H transfer) includes the abovementioned uncultured  
285 taxa plus accompanying streamlined members of the “microbial dark matter” such as  
286 Omnitrophota, Patescibacteria (*Ca.* Microgenomates, Portnoybacteria, Paceibacteria) or  
287 Nanoarchaeota (*Ca.* Aenigmarchaeota, Woearchaeota, Pacearchaeota), groups from which  
288 we also obtained MAGs (see Table 2). Various types of hydrogenases and hydrogen  
289 metabolism pathways grouped with the 750 m mesopelagic sample in the dbRDA plot (Fig. 2)  
290 and were found in the vast majority of microbes inhabiting this sulfide enriched waters,  
291 including NAD-reducing bidirectional (*hox* genes) and uptake hydrogenases (*hup* genes), NiFe  
292 (*hyp* genes) and FeFe (*hym* genes) hydrogenases, Coenzyme F420-reducing hydrogenases or  
293 carbon monoxide induced hydrogenases (*CooHL* genes), all of which showed the highest gene/  
294 recA ratios (from 0.2 in *hym* genes to 1-2 for *hyp* and *hoxF*) in euxinic waters.

295

296 It was remarkable the presence of two Actinobacteria MAGs (BS750m-G1/G2) in these  
297 sulfide-rich waters. These yet unclassified members have their highest resemblance with  
298 MAGs retrieved from groundwater aquifers (Actinobacteria bacterium  
299 CG08\_land\_8\_20\_14\_0\_20\_35\_9, classified as UBA1414 by GTDB) and have very small GC  
300 content (31-34 %) and predicted genome sizes (ca. 1.4-1.6 Mb). Their genomes presented

301 various mixed-acid fermentative pathways associated with the production of ethanol (alcohol  
302 dehydrogenase), lactate (lactate dehydrogenase), formate (pyruvate-formate lyase) and H<sub>2</sub>/CO<sub>2</sub>  
303 (formate hydrogen lyase). They also showed an active hydrogen metabolism with various NiFe  
304 hydrogenases including Coenzyme F<sub>420</sub>-reducing hydrogenase, *hyp* genes and HyaA  
305 COG1740 355 Ni-Fe-hydrogenase I. Another remarkable group of microbes was  
306 Omnitrophota, from which we obtained 15 MAGs with variable estimated genomes sizes (from  
307 1 to 3 Mb). For instance, the most abundant MAG retrieved from our samples (BS750m-G77)  
308 presented a small predicted genome size (ca. 1.2 Mb) and was an obligate fermenter (mainly  
309 producing ethanol, H<sub>2</sub>/CO<sub>2</sub> and lactate). Another group of streamlined members of the  
310 microbial dark matter were Aenigmarchaeota (BS750m-G24/36/81/83/) and Nanoarchaeota  
311 (BS750m-G11/13/70) MAGs, which had estimated genome sizes of 1-1.5 Mb. Among their  
312 metabolic potential, they were also mixed-acid fermenters, including lactate or H<sub>2</sub>/CO<sub>2</sub> as  
313 fermentation by-products, which would fuel the sulfate reducers, conforming a syntrophic  
314 network with the rest of mixed-acid fermenters. Finally, another set of microbes of small  
315 genome sizes (0.6-1.6 Mb) were Patescibacteria (former Candidate Phyla Radiation). We must  
316 highlight the presence of the protein VirB4, associated with type IV secretion systems that  
317 work as injectors into host cells [22], in *Ca. Microgenomates* BS750m-G73/74, *Ca.*  
318 *Paceibacteria* BS750m-G71/75 and *Ca. Portnoybacteria* bacterium BS750m-G76. These  
319 proteins were unique for these microbes in the entire euxinic waters, which suggests a parasitic  
320 lifestyle from which these Patescibacteria could translocate nutrients, proteins, and DNA from  
321 or to a putative host [22].

322

### 323 **Similarities between Black Sea datasets assessed by read and recruitment analysis**

324 To assess the representativity of our samples we also compared the reads between our Black  
325 Sea datasets and those from a former sampling campaign [5,8], deposited into the NCBI under

326 bioproject PRJNA649215, observing a clear 16S rRNA taxonomy and read clusterization  
327 between samples (Fig. S6). Among all of the MAGs retrieved from this work, we selected the  
328 30 most abundant MAGs (> 10 RPKGs in any of the recruited samples) from the oxic,  
329 redoxcline and anoxic waters and recruited them at > 95 % of identity (species level) on all  
330 metagenomes (Fig. 3). The rest of our MAGs abundance among all datasets is shown in detail  
331 in Additional File 3. As expected, emblematic key players of the oxic waters harboring a  
332 phototrophic/photoheterotrophic lifestyle such as *Ca. Pelagibacter*, *Ca. Actinomarina*, SAR86,  
333 *Synechococcus* or Flavobacteriaceae were detected at high numbers in all oxic metagenomic  
334 datasets. Next, we also showed the main ecological drivers of the redoxcline layer, which  
335 included chemolithotrophic S oxidizers and C fixers such as *Ca. Thioglobus* and dissimilatory  
336 nitrate reducers such as *Sulfurimonas*, both of which were recently analyzed members by  
337 previous publication [8]. The redoxcline also showed some other ecologically relevant nitrate  
338 reducers such as Bacteroidales MAGs, ammonia oxidizers such as *Nitrosopumilus* spp, sulfate  
339 reducers Desulfatiglandales and Desulfococcales novel species and several Marinimicrobia  
340 representatives which are specialized in the H metabolism, denitrification and mixed-acid  
341 fermentation. Finally, another set of MAGs were detected among all euxinic strata. These  
342 included various other sulfate-reducers, their associated microbiota performing mixed-acid  
343 fermentations and H metabolism in syntrophism (Cloacimonadetes, Woesearchaeales, *Ca.*  
344 *Aminicenantes*) and the only MAG able to perform methanogenesis and ANME, a  
345 *Syntrophoarchaeum* that showed a remarkable abundance in 1000 and 2000 m metagenomic  
346 datasets, suggesting that methane metabolisms indeed coexist with the sulfate reduction and all  
347 associated microbial fermenters and H<sub>2</sub> scavengers in a complex syntrophic network.

348

349

350

351 **Conclusions**

352

353 The present study, together with others from the same Black Sea [5,8] (bioproject  
354 PRJNA649215) and those recent ones from the Cariaco Basin in Venezuela [21,23] show a  
355 first glimpse on the microbiome of anoxic marine water columns. The redoxclines of these  
356 habitats show a convergence of various metabolisms at a time, among which we encounter  
357 anoxygenic photosynthesis such as that one observed in *Chlorobium phaeobacteroides* [24],  
358 ammonia oxidation by *Nitrosopumilus* spp., chemolithotrophic metabolisms carried by  
359 Gammaproteobacteria such *Ca. Thioglobus*, one of the most abundant and versatile players  
360 transitioning between oxic-anoxic regimes [19,25]. This microbe has been detected both in  
361 Cariaco and Black Sea basins [8] and its adaptive metabolism, which includes physiological  
362 adaptations to the oxic-anoxic growth [25] and its wide set of metabolic tools has led it to  
363 colonize these zones with a large contribution to S and N biogeochemical cycles as a denitrifier,  
364 sulfur-oxidizing and C fixer chemolithotroph. The simultaneous activity of sulfate-reducing  
365 and sulfide-oxidizing microbes in these habitats has led to a term known as the “cryptic sulfur  
366 cycle” [20]. One of the most abundant microbes detected from these zones is Marinimicrobia,  
367 which are specialists of both oxic and anoxic waters [26,27], able to perform denitrification  
368 and various fermentations and H<sub>2</sub> metabolism and were recently labeled as organoheterotrophs  
369 with specific molybdoenzymes to preserve energy from sulfur cycle intermediates [8].

370

371 As we approach the euxinic mesopelagic and bathypelagic waters, we tend to encounter a  
372 fundamental domination of sulfate reduction coupled with a complex variety of syntrophic  
373 networks that feed the ecosystem. In this sense, Desulfobacterota is a good example of a  
374 syntrophic phylum that could be able to accept electrons from other electron donors, as noted  
375 previously in marine sediments [28]. It appears that the extremely high abundance of sulfate-



376 reducers in the Black Sea has displaced methanogens, which are present in the water column  
377 but at low numbers, having obtained Bathyarchaeota [29,30] representatives and a single  
378 example of a *Syntrophoarchaeum* from this study. In fact, this last microbe could be performing  
379 reverse methanogenesis or anaerobic methane oxidation (ANME) in the system. Recently,  
380 members of this newly identified species have shown the complete oxidation of butane during  
381 the anaerobic methane oxidation process [31]. However, it appears that the competition  
382 between methanogens and sulfate-reducers for acetate is dominated by the latter, which also  
383 take a fundamental role in the syntrophic network by uptaking all the H<sub>2</sub> produced by the  
384 fermenters. Among all of the associated microbiota, we must highlight the presence of  
385 Cloacimonadota phyla (previously known as WWE1), which have shown up in meromictic  
386 lakes as important carbon and sulfur recyclers [32] and appear to degrade propionic acid in  
387 syntrophic networks in bioreactors [33]. Novel microbes from lineages such as  
388 Cloacimonadota (WWE1), Marinisomatota (SAR406), Omnitrophicaeota (OP3),  
389 Bacteroidales, Kiritimatiellae, Anaerolinea/Dehalococcoidia formed a very complex  
390 syntrophic network where mainly mixed-acid fermentations with lactate, ethanol, formate,  
391 succinate, hydrogen and CO<sub>2</sub> were formed as final products. Other exotic members of this  
392 system included the uncultured microbial dark matter, such as Patescibacteria and  
393 Nanoarchaeota [34–37]. In particular, we have stumbled upon various members of  
394 Aenigmarchaeota [38] and Woesearchaeales that showed streamlined genomes.

395

## 396 *Methods*

397

### 398 *Sampling, DNA extraction, physical and chemical profiles measurement*

399 Samples for metagenome analyses were collected from St. 301 (5 m deep) and St. 307 (5, 30,  
400 150, and 750 m deep) in October 2019 (coordinates 43.155517 N 28.005383 E and 43.1696 N



401 and 29.001283 E, respectively). Up to 6.9 L of seawater from each sampling depth were filtered  
402 through a series of 20  $\mu\text{m}$  Nylon Net filters (Millipore), 5  $\mu\text{m}$  polycarbonate membrane filters  
403 (Millipore), and 0.22  $\mu\text{m}$  Sterivex<sup>TM</sup> Filter Units (Merck). DNA was then extracted using  
404 standard phenol-chloroform protocol [39]. In short, Sterivex filters were treated with CTAB  
405 lysis buffer and then treated with 1 mg ml<sup>-1</sup> lysozyme and 0.2 mg ml<sup>-1</sup> proteinase K (final  
406 concentrations). Then nucleic acids were purified with phenol/chloroform/isoamyl alcohol and  
407 chloroform/isoamyl alcohol.

408

#### 409 *Sequencing, assembly and read annotation*

410 The five samples were sequenced in one lane of Illumina HiSeq X Ten PE 2X150 bp  
411 (Novogene company), which provided ca. 180-200 million clean reads and 24 Gb of output for  
412 each sample. Samples were individually assembled using IDBA-UD [40] with the parameters  
413 --pre\_correction, --mink 50, --maxk 140, --step 10. Sub-assemblies of 20 million reads were  
414 done in each sample to retrieve some of the most abundant microbes that assembled poorly i.e.  
415 we reduced the total number of reads to obtain more complete bins of these representatives  
416 (e.g. Pelagibacterales, Actinomarinales, *Synechococcus*, Marinimicrobia or *Thioglobus* spp.).  
417 Annotation of contigs was assessed using Prodigal [41] for ORF prediction and then BLAST  
418 (nr database) using Diamond for functional annotation [42]. Proteins were annotated with latest  
419 nr, COG [43], and TIGFRAM [44] to provide the most updated taxonomy. Features like tRNAs  
420 and rRNAs were detected with tRNAscan [45] and ssu-align [46], respectively.

421

#### 422 *Binning, classification, and MAG statistics*

423 Binning procedure was performed as follows: a first manual inspection was done assigning a  
424 hit (based on BLAST against Nr) to each CDS, which allowed us to classify contigs  
425 taxonomically into different phyla. Then, an initial binning step was applied for each set of

426 contigs assigned to each phylum with METABAT2 [47] using coverage in the different  
427 samples. Afterwards, further manual inspection of contigs was applied using GC content,  
428 coverage and tetranucleotide frequencies to refine the bins [48,49]. Finally we only used MAGs  
429 with < 5 % contamination and > 50 % of completeness based on CheckM estimations [50].  
430 MAGs were taxonomically classified according to the latest version of GTDB-tk and the  
431 database release89 [13] and whenever we could we used class, order, family, genus or species  
432 names for all of them.

433

#### 434 *16S rRNA read classification, hierarchical cluster read analysis, read functionality*

435 The 16S rRNA gene reads were detected in a subset of 20 million reads from each metagenome.  
436 We first obtained candidates using USEARCH [51] with RefSeq 16S rRNA as database and  
437 then these putative 16S rRNA were confirmed using ssu-align[46]. Then, a BLASTN was  
438 performed against the SILVA database [11] (SILVA\_138\_SSURef\_Nr99\_Tax\_silva from  
439 December 2019) to provide a taxonomic classification. Hierarchical cluster analysis  
440 (dendrograms) of different metagenomic samples with k-mer=21 bp was assessed with SIMKA  
441 [52] and Bray-Curtis indexes of presence/absence were obtained. Subsets of 20 million reads  
442 of each metagenomes were analyzed with BLASTX against SEED [12] database using  
443 Diamond [42], with parameters more-sensitive, max-target-seqs 1, e-value 0.00001 > 50 bp of  
444 alignment length and > 50 % identity. The top hits were analyzed in search of specific genes  
445 and pathways based on the SEED database. Hits were normalized by the total number of hit  
446 counts for each sample and a row Z-score was calculated to assess statistical differences  
447 between samples for each metabolic pathway.

448

449

450

451 *Relative abundance of MAGs*

452 To estimate the relative abundance of the recovered genomes in various datasets we performed  
453 read recruitment and mapping, which was assessed considering BLASTN hits of the  
454 metagenomic reads against each MAG at > 95 % identity and 50 bp of alignment length  
455 thresholds, as indication of belonging to the same species. A microbe was considered present  
456 in a metagenome if it was detected at > 1 RPKG (Reads per Kb of Genome per Gb of  
457 Metagenome). All relative abundances of our MAGs on Black Sea datasets are shown in  
458 Additional File 3. Datasets used for recruitment included Black Sea (PRJNA649215) and  
459 Cariaco Basin (PRJNA326482).

460

461 *Redundancy analysis (RDA) of environmental variables, MAGs, and metabolic processes*

462 Distance-based redundancy analysis (dbRDA) analysis was performed to describe the  
463 ordinations of the main MAGs and metabolic processes in an environmentally constrained  
464 space [53] and conducted with the R package vegan [54]. Environmental matrixes were  
465 constructed with 12 environmental variables for the 5 Black Sea samples. Each matrix was  
466 square-root transformed and normalized and subsequently transformed to Euclidean  
467 resemblance matrix. On the other hand, we constructed the other two matrixes with the  
468 recovered MAGs and metabolic processes with 30 selected metabolic processes. Both were  
469 standardized and square root transformed before performing a Bray–Curtis dissimilarity  
470 resemblance matrix. Two dbRDA were obtained, the first one comprising the recovered  
471 genomes (MAGs) matrix using environmental matrix as predictor variable, and a second one  
472 based on the metabolic processes matrix using environmental matrix as predictor variable.

473

474

475

476 *Availability of data and materials*

477 All metagenomes and reconstructed genomes derived from this work are publicly available  
478 under the NCBI Bioproject PRJNA638805. Metagenomes were deposited to NCBI-SRA with  
479 the accession numbers SRR12042682-SRR12042686.

480

481 *Declarations*

482 *Acknowledgements*

483

484 This work was supported by grants “VIREVO” CGL2016-76273-P [MCI/AEI/FEDER, EU]  
485 (cofounded with FEDER funds) from the Spanish Ministerio de Ciencia e Innovación and  
486 “HIDRAS3” PROMETEO/2019/009 from Generalitat Valenciana. FRV was also a beneficiary  
487 of the 5top100-program of the Ministry for Science and Education of Russia. PJC-Y was  
488 supported by APOSTD/2019/009 Post-Doctoral Fellowship from Generalitat Valenciana. This  
489 research has been carried out thanks to the International Bilateral Project between the Italian  
490 National Research Council and the Bulgarian Academy of Science (CNR-BAS), and in the  
491 framework of the National Science Program “Environmental Protection and Reduction of  
492 Risks of Adverse Events and Natural Disasters,” approved by the Resolution of the Council of  
493 Ministers No. 577/17.08.2018 and supported by the Ministry of Education and Science (MES)  
494 of Bulgaria (Agreement No. D01- 230/06.12.2018).

495

496 *Author contributions*

497 FR-V, CC, PJC-Y and SM conceived the study. ND, VS, NS and SM performed metadata  
498 analysis and sample collection. PJC-Y and JR-G performed DNA extraction. PJC-Y, AP, MM,  
499 JH-M analyzed the metagenomic data. PJC-Y, FR-V and MM wrote the manuscript. All  
500 authors read and approved the manuscript.

501 ***Consent for publication***

502 All authors have read and commented the manuscript and consent the publication.

503 ***Competing interests***

504 The author(s) declare no competing interest.

505 ***Availability of data and material***

506 All data derived from this work is publicly available in the NCBI-Genbank databases.

507 ***Ethical approval and consent to participate***

508 This article does not contain any studies with human participants or animals performed by any  
509 of the authors.

510 ***Funding***

511 The authors declare no relevant funding.

512

513 ***References***

514

515 1. Konovalov SK, Murray JW, Luther III GW. Black Sea Biogeochemistry. *Oceanography*.

516 2005;18:24–35.

517 2. Stanev EV, He Y, Staneva J, Yakushev E. Mixing in the black sea detected from the

518 temporal and spatial variability of oxygen and sulfide: Argo float observations and numerical

519 modelling. European Geosciences Union; 2014;

520 3. Murray JW, Top Z, Özsoy E. Hydrographic properties and ventilation of the Black Sea.

521 *Deep Sea Res Part A Oceanogr Res Pap*. Elsevier; 1991;38:S663–89.

522 4. Conley DJ, Bjorck S, Bonsdorff E, Carstensen J, Destouni G, Gustafsson BG, et al.

523 Hypoxia-related processes in the Baltic Sea. *Environ Sci Technol*. ACS Publications;

524 2009;43:3412–20.

525 5. Suominen S, Dombrowski N, Sinninghe Damsté JS, Villanueva L. A diverse uncultivated

- 526 microbial community is responsible for organic matter degradation in the Black Sea sulphidic  
527 zone. *Environ Microbiol.* Wiley Online Library; 2020;
- 528 6. Callieri C, Slabakova V, Dzhembekova N, Slabakova N, Peneva E, Cabello-Yeves PJ, et  
529 al. The mesopelagic anoxic Black Sea as an unexpected habitat for *Synechococcus* challenges  
530 our understanding of global “deep red fluorescence.” *ISME J.* Nature Publishing Group;  
531 2019;1.
- 532 7. Di Cesare A, Dzhembekova N, Cabello-Yeves PJ, Eckert EM, Slabakova V, Slabakova N,  
533 et al. Genomic Comparison and Spatial Distribution of Different *Synechococcus* Phylotypes  
534 in the Black Sea. *Front Microbiol.* Frontiers; 2020;11:1979.
- 535 8. van Vliet DM, von Meijenfildt FAB, Dutilh BE, Villanueva L, Sinninghe Damsté JS,  
536 Stams AJM, et al. The bacterial sulfur cycle in expanding dysoxic and euxinic marine waters.  
537 *Environ Microbiol.* Wiley Online Library;
- 538 9. Haro-Moreno JM, López-Pérez M, José R, Picazo A, Camacho A, Rodriguez-Valera F.  
539 Fine metagenomic profile of the Mediterranean stratified and mixed water columns revealed  
540 by assembly and recruitment. *Microbiome.* BioMed Central; 2018;6:128.
- 541 10. Mehrshad M, Amoozegar MA, Ghai R, Fazeli SAS, Rodriguez-Valera F. Genome  
542 reconstruction from metagenomic datasets reveals novel microbes in the brackish waters of  
543 the Caspian Sea. *Appl Environ Microbiol.* 2016;AEM. 03381-15.
- 544 11. Quast C, Pruesse E, Yilmaz P, Gerken J, Schweer T, Yarza P, et al. The SILVA  
545 ribosomal RNA gene database project: improved data processing and web-based tools.  
546 *Nucleic Acids Res.* Oxford University Press; 2012;41:D590–6.
- 547 12. Overbeek R, Olson R, Pusch GD, Olsen GJ, Davis JJ, Disz T, et al. The SEED and the  
548 Rapid Annotation of microbial genomes using Subsystems Technology (RAST). *Nucleic*  
549 *Acids Res.* 2013;42:D206–14.
- 550 13. Parks DH, Chuvochina M, Waite DW, Rinke C, Skarszewski A, Chaumeil P-A, et al. A

- 551 standardized bacterial taxonomy based on genome phylogeny substantially revises the tree of  
552 life. *Nat Biotechnol.* Nature Publishing Group; 2018;
- 553 14. Cabello-Yeves PJ, Zemskaya TI, Zakharenko AS, Sakirko M V, Ivanov VG, Ghai R, et  
554 al. Microbiome of the deep Lake Baikal, a unique oxic bathypelagic habitat. *Limnol*  
555 *Oceanogr.* Wiley Online Library; 2019;
- 556 15. Scanlan DJ, Ostrowski M, Mazard S, Dufresne A, Garczarek L, Hess WR, et al.  
557 Ecological genomics of marine picocyanobacteria. *Microbiol Mol Biol Rev.* 2009;73:249–99.
- 558 16. Haro-Moreno JM, Rodriguez-Valera F, Rosselli R, Martinez-Hernandez F, Roda-Garcia  
559 JJ, Gomez ML, et al. Ecogenomics of the SAR11 clade. *Environ Microbiol.* Wiley Online  
560 Library; 2020;22:1748–63.
- 561 17. Hugerth LW, Larsson J, Alneberg J, Lindh M V, Legrand C, Pinhassi J, et al.  
562 Metagenome-assembled genomes uncover a global brackish microbiome. *Genome Biol.*  
563 2015;16:1–18.
- 564 18. Overmann J, Cypionka H, Pfennig N. An extremely low-light adapted phototrophic sulfur  
565 bacterium from the Black Sea. *Limnol Oceanogr.* Wiley Online Library; 1992;37:150–5.
- 566 19. Marshall KT, Morris RM. Isolation of an aerobic sulfur oxidizer from the  
567 SUP05/Arctic96BD-19 clade. *ISME J.* Nature Publishing Group; 2013;7:452–5.
- 568 20. Callbeck CM, Lavik G, Ferdelman TG, Fuchs B, Gruber-Vodicka HR, Hach PF, et al.  
569 Oxygen minimum zone cryptic sulfur cycling sustained by offshore transport of key sulfur  
570 oxidizing bacteria. *Nat Commun.* Nature Publishing Group; 2018;9:1–11.
- 571 21. Suter EA, Pachiadaki M, Taylor GT, Astor Y, Edgcomb VP. Free-living  
572 chemoautotrophic and particle-attached heterotrophic prokaryotes dominate microbial  
573 assemblages along a pelagic redox gradient. *Environ Microbiol.* Wiley Online Library;  
574 2018;20:693–712.
- 575 22. McLean JS, Bor B, Kerns KA, Liu Q, To TT, Solden L, et al. Acquisition and adaptation

- 576 of ultra-small parasitic reduced genome bacteria to mammalian hosts. *Cell Rep.* Elsevier;  
577 2020;32:107939.
- 578 23. Mara P, Vik D, Pachiadaki MG, Suter EA, Poulos B, Taylor GT, et al. Viral elements and  
579 their potential influence on microbial processes along the permanently stratified Cariaco  
580 Basin redoxcline. *ISME J.* Nature Publishing Group; 2020;1–14.
- 581 24. Marschall E, Jogler M, Henßge U, Overmann J. Large-scale distribution and activity  
582 patterns of an extremely low-light-adapted population of green sulfur bacteria in the Black  
583 Sea. *Environ Microbiol.* Wiley Online Library; 2010;12:1348–62.
- 584 25. Shah V, Zhao X, Lundeen RA, Ingalls AE, Nicastro D, Morris RM. Morphological  
585 plasticity in a sulfur-oxidizing marine bacterium from the SUP05 clade enhances dark carbon  
586 fixation. *MBio.* Am Soc Microbiol; 2019;10.
- 587 26. Bertagnolli AD, Padilla CC, Glass JB, Thamdrup B, Stewart FJ. Metabolic potential and  
588 in situ activity of marine Marinimicrobia bacteria in an anoxic water column. *Environ*  
589 *Microbiol.* Wiley Online Library; 2017;19:4392–416.
- 590 27. Hawley AK, Nobu MK, Wright JJ, Durno WE, Morgan-Lang C, Sage B, et al. Diverse  
591 Marinimicrobia bacteria may mediate coupled biogeochemical cycles along eco-  
592 thermodynamic gradients. *Nat Commun.* Nature Publishing Group; 2017;8:1–10.
- 593 28. Skennerton CT, Chourey K, Iyer R, Hettich RL, Tyson GW, Orphan VJ. Methane-fueled  
594 syntrophy through extracellular electron transfer: uncovering the genomic traits conserved  
595 within diverse bacterial partners of anaerobic methanotrophic archaea. *MBio.* Am Soc  
596 *Microbiol;* 2017;8:e00530-17.
- 597 29. Zhou Z, Pan J, Wang F, Gu J-D, Li M. Bathyarchaeota: globally distributed metabolic  
598 generalists in anoxic environments. *FEMS Microbiol Rev.* Oxford University Press;  
599 2018;42:639–55.
- 600 30. Evans PN, Parks DH, Chadwick GL, Robbins SJ, Orphan VJ, Golding SD, et al. Methane



- 601 metabolism in the archaeal phylum Bathyarchaeota revealed by genome-centric  
602 metagenomics. *Science* (80- ). American Association for the Advancement of Science;  
603 2015;350:434–8.
- 604 31. Laso-Pérez R, Wegener G, Knittel K, Widdel F, Harding KJ, Krukenberg V, et al.  
605 Thermophilic archaea activate butane via alkyl-coenzyme M formation. *Nature*. Nature  
606 Publishing Group; 2016;539:396–401.
- 607 32. Hamilton TL, Bovee RJ, Sattin SR, Mohr W, Gilhooly III WP, Lyons TW, et al. Carbon  
608 and sulfur cycling below the chemocline in a meromictic lake and the identification of a  
609 novel taxonomic lineage in the FCB superphylum, *Candidatus Aegiribacteria*. *Front*  
610 *Microbiol. Frontiers*; 2016;7:598.
- 611 33. Solli L, Håvelsrud OE, Horn SJ, Rike AG. A metagenomic study of the microbial  
612 communities in four parallel biogas reactors. *Biotechnol Biofuels*. Springer; 2014;7:146.
- 613 34. Anantharaman K, Brown CT, Hug LA, Sharon I, Castelle CJ, Probst AJ, et al. Thousands  
614 of microbial genomes shed light on interconnected biogeochemical processes in an aquifer  
615 system. *Nat Commun*. Nature Publishing Group; 2016;7:13219.
- 616 35. Nobu MK, Narihiro T, Rinke C, Kamagata Y, Tringe SG, Woyke T, et al. Microbial dark  
617 matter ecogenomics reveals complex synergistic networks in a methanogenic bioreactor.  
618 *ISME J*. Nature Publishing Group; 2015;9:1710–22.
- 619 36. Rinke C, Schwientek P, Sczyrba A, Ivanova NN, Anderson IJ, Cheng J-F, et al. Insights  
620 into the phylogeny and coding potential of microbial dark matter. *Nature*. Nature Publishing  
621 Group; 2013;499:431.
- 622 37. Castelle CJ, Brown CT, Anantharaman K, Probst AJ, Huang RH, Banfield JF.  
623 Biosynthetic capacity, metabolic variety and unusual biology in the CPR and DPANN  
624 radiations. *Nat Rev Microbiol*. Nature Publishing Group; 2018;16:629.
- 625 38. Li Y-X, Rao Y-Z, Qi Y-L, Qu Y-N, Chen Y-T, Jiao J-Y, et al. Deciphering symbiotic

- 626 interactions of ‘Candidatus Aenigmarchaeota’ with inferred horizontal gene transfers and co-  
627 occurrence networks. 2020;
- 628 39. Martín-Cuadrado A-B, López-García P, Alba J-C, Moreira D, Monticelli L, Strittmatter  
629 A, et al. Metagenomics of the deep Mediterranean, a warm bathypelagic habitat. PLoS One.  
630 2007;2:e914.
- 631 40. Peng Y, Leung HCM, Yiu S-M, Chin FYL. IDBA-UD: a de novo assembler for single-  
632 cell and metagenomic sequencing data with highly uneven depth. Bioinformatics.  
633 2012;28:1420–8.
- 634 41. Hyatt D, Chen G-L, LoCascio PF, Land ML, Larimer FW, Hauser LJ. Prodigal:  
635 prokaryotic gene recognition and translation initiation site identification. BMC  
636 Bioinformatics. 2010;11:1.
- 637 42. Buchfink B, Xie C, Huson DH. Fast and sensitive protein alignment using DIAMOND.  
638 Nat Methods. 2015;12:59–60.
- 639 43. Tatusov RL, Natale DA, Garkavtsev I V, Tatusova TA, Shankavaram UT, Rao BS, et al.  
640 The COG database: new developments in phylogenetic classification of proteins from  
641 complete genomes. Nucleic Acids Res. 2001;29:22–8.
- 642 44. Haft DH, Loftus BJ, Richardson DL, Yang F, Eisen JA, Paulsen IT, et al. TIGRFAMs: a  
643 protein family resource for the functional identification of proteins. Nucleic Acids Res.  
644 2001;29:41–3.
- 645 45. Lowe TM, Eddy SR. tRNAscan-SE: a program for improved detection of transfer RNA  
646 genes in genomic sequence. Nucleic Acids Res. 1997;25:955–64.
- 647 46. Nawrocki EP, Eddy SR. ssu-align: a tool for structural alignment of SSU rRNA  
648 sequences. URL <http://selab.janelia.org/software.html>; 2010.
- 649 47. Kang D, Li F, Kirton ES, Thomas A, Egan RS, An H, et al. MetaBAT 2: an adaptive  
650 binning algorithm for robust and efficient genome reconstruction from metagenome

651 assemblies. PeerJ Prepr. PeerJ Inc. San Diego, USA; 2019;7:e27522v1.

652 48. Lê S, Josse J, Husson F. FactoMineR: an R package for multivariate analysis. J Stat  
653 Softw. 2008;25:1–18.

654 49. Rice P, Longden I, Bleasby A. EMBOSS: the European molecular biology open software  
655 suite. Trends Genet. 2000;16:276–7.

656 50. Parks DH, Imelfort M, Skennerton CT, Hugenholtz P, Tyson GW. CheckM: assessing the  
657 quality of microbial genomes recovered from isolates, single cells, and metagenomes.  
658 Genome Res. 2015;25:1043–55.

659 51. Edgar RC. Search and clustering orders of magnitude faster than BLAST. Bioinformatics.  
660 2010;26:2460–1.

661 52. Benoit G. Simka: fast kmer-based method for estimating the similarity between numerous  
662 metagenomic datasets. RCAM. 2015.

663 53. Legendre P, Anderson MJ. Distance-based redundancy analysis: testing multispecies  
664 responses in multifactorial ecological experiments. Ecol Monogr. Wiley Online Library;  
665 1999;69:1–24.

666 54. Oksanen J, Kindt R, Legendre P, O’Hara B, Stevens MHH, Oksanen MJ, et al. The vegan  
667 package. Community Ecol Packag. 2007;10:631–7.

668

669

670

671

672

673

674

675

676 **Figure legends**

677

678 **Fig 1.** Black Sea phylum level 16S rRNA classification (A) and metabolic profiles assessed  
679 with SEED subsystems (B).

680 **Fig. 2.** Black Sea dbRDA analysis between different samples (depths), environmental  
681 parameters and A) Metabolic pathways and B) MAG classification.

682 **Fig. 3.** Recruitment analysis of the 30 most abundant Black Sea MAGs retrieved from our  
683 datasets (in red) and detected at highest values at various Black Sea metagenomes from the  
684 NCBI (Bioproject PRJNA649215). Reads were recruited at > 95 % of identity and > 50 bp of  
685 alignment lengths. The predominant metabolism is characteristic of each MAG and was  
686 detected in the genome and assessed by the literature.

687

688 **Supplementary Figure legends**

689

690 **Fig S1.** Black Sea sampling points (A) and physicochemical profiles (B). Each environmental  
691 measurement is color-coded.

692 **Fig S2.** Estimated genome size (Mb) versus GC content of all Black Sea MAGs retrieved in  
693 this work. Shape indicates the depth at which the MAG was recovered. MAGs are color-coded  
694 at the phylum level.

695 **Fig. S3.** Recruitment plot of *Chlorobium phaeobacteroides* BS150m-G13 from the Black Sea  
696 150 m pycnocline metagenome. Each dot represents a mapped read at > 95 % of identity and  
697 > 50 bp of alignment lengths.

698 **Fig. S4.** Recruitment plot of *Thioglobus* sp. BS150m-G33/G29 from the Black Sea 150 m  
699 pycnocline metagenome. Each dot represents a mapped read at > 95 % of identity and > 50 bp  
700 of alignment lengths.

701 **Fig. S5.** Comparison of Black Sea and Cariaco Basin redoxclines at the level of A) 16S rRNA  
702 taxonomic classification, B) Hierarchical read cluster analysis with Bray-Curtis  
703 presence/absence indexes and C) Black Sea species recruiting at the Cariaco depth profile  
704 datasets (PRJNA326482).

705 **Fig. S6.** Comparison of Black Sea metagenomic datasets from the present study (in red) and  
706 those available from the NCBI database (Bioproject PRJNA649215). Comparison made at the  
707 level of A) Phylum 16S rRNA taxonomic classification, B) Heatmap read cluster analysis with  
708 Bray-Curtis presence/absence indexes.

709

710

711

712

713

714

715

716

717

718

719

720

721

722

723

724

725

726

727

728

729

730

731

732

733

734

735

736

737

738

739

740

741

742 **Table 1.** Summary statistics and features of Black Sea MAGs retrieved from 5 and 30 m  
743 samples.

744

| Phylum/Division          | Taxonomic affiliation of MAGs (GTDB, Referenced groups)                                                                                                                                                                                                                                                                                                                       | n° of MAGs | Range Estimated Genome size (Mp) | Range GC (%) | Range median intergenic spacer (bp) | Av. Compl. (%) | Av. Cont. (%) |
|--------------------------|-------------------------------------------------------------------------------------------------------------------------------------------------------------------------------------------------------------------------------------------------------------------------------------------------------------------------------------------------------------------------------|------------|----------------------------------|--------------|-------------------------------------|----------------|---------------|
| $\alpha$ -Proteobacteria | <i>g</i> _Planktomarina (3), <i>g</i> _Puniceispirillum (6), <i>g</i> _Reyranella (1), <i>f</i> _Rhodobacteraceae (7), <i>o</i> _Pelagibacterales (8), <i>o</i> _Parvibaculales (5), <i>f</i> _Puniceispirillaceae (6), <i>f</i> _Nisaeaceae (1), <i>o</i> _Rickettsiales (3), <i>o</i> _Rhizobiales (2), <i>o</i> _Rhodospirillales_A (1), <i>c</i> _Alphaproteobacteria (3) | 52         | 1-7.9                            | 28-66        | 2-65                                | 75.55          | 1.19          |
| $\gamma$ -Proteobacteria | <i>g</i> _Luminiphilus (11), <i>g</i> _Litoricola (3), <i>g</i> _Nevskia (1), <i>f</i> _Methylophilaceae (5), <i>f</i> _Porticoccaceae (1), <i>f</i> _Pseudohongiellaceae (5), <i>f</i> _Shewanellaceae (1), <i>o</i> _Burkholderiales (2), <i>o</i> _SAR86 (11) <i>o</i> _Pseudomonadales (5), <i>c</i> _Gammaproteobacteria (3)                                             | 51         | 1-4.1                            | 31-69        | 1-86                                | 70.34          | 1.29          |
| Bacteroidota             | <i>f</i> _Cryomorphaceae (4), <i>f</i> _Flavobacteriaceae (23), <i>o</i> _Flavobacteriales (8), <i>f</i> _Balneolaceae (2), <i>f</i> _Crocinitomicaceae (2), <i>c</i> _Bacteroidia (1)                                                                                                                                                                                        | 44         | 1.19-2.57                        | 28-58        | 4-43                                | 73.91          | 0.94          |
| Thermoplasmata           | <i>f</i> _Poseidoniaceae (6), <i>f</i> _Thalassoarchaeaceae (1), <i>g</i> _Poseidonia (6)                                                                                                                                                                                                                                                                                     | 13         | 1.82-2.35                        | 37-58        | 25-38                               | 80.67          | 0.30          |
| Actinobacteriota         | <i>o</i> _Nanopelagiales (1), <i>g</i> _Aquiluna (1), <i>o</i> _Actinomarinales (5), <i>f</i> _Ilumatobacteraceae (4), <i>c</i> _Thermoleophilia (1)                                                                                                                                                                                                                          | 13         | 1.23-2.22                        | 32-71        | 2-23                                | 76.79          | 1.45          |
| Cyanobacteria            | <i>g</i> _Synechococcus_C (10)                                                                                                                                                                                                                                                                                                                                                | 10         | 1.8-2.23                         | 55-63        | 25-36                               | 79.59          | 2.37          |
| Planctomycetota          | <i>f</i> _Planctomycetaceae (1), <i>o</i> _Pirellulales; (4), <i>p</i> _Planctomycetota (3), <i>g</i> _Rubripirellula (1)                                                                                                                                                                                                                                                     | 9          | 3-6.4                            | 49-72        | 45-132                              | 87.14          | 0.95          |
| Verrucomicrobiota        | <i>o</i> _Pedosphaerales (2), <i>o</i> _Opitutales (1), <i>f</i> _Puniceicoccaceae (4), <i>f</i> _Akkermansiaceae (1)                                                                                                                                                                                                                                                         | 8          | 2-4.8                            | 42-60        | 23-74                               | 83.51          | 4.21          |
| Marinisomatota           | <i>g</i> _Marinisoma (3)                                                                                                                                                                                                                                                                                                                                                      | 3          | 0.8-0.93                         | 31-32        | 2-3                                 | 55.31          | 0.36          |
| Margulisbacteria         | <i>c</i> _ZB3 (1)                                                                                                                                                                                                                                                                                                                                                             | 1          | 1.71                             | 42.5         | 10                                  | 67.53          | 0             |

745

746

747

748

749

750

751

752

753

754

755

756

757

758

759

760

761

762

763

764

765

Paranthesis () indicate the average value of each field in case of range values and number of MAGs in bold for each taxonomic affiliation. Taxonomic classification follows GTDB criteria. Marinisomatota includes former Marinimicrobia. Thermoplasmata includes former Euryarchaeota group. d\_ :Domain, p\_ :Phylum, c\_ :Class, o\_ :Order, f\_ :family, g\_ :Genus, s\_ : Species. Av. (Average), Compl. (Completeness), Cont. (Contamination).

766  
767

**Table 2.** Summary statistics and features of Black Sea 150 and 750 m retrieved MAGs.

| Phylum/Division          | Taxonomic affiliation of MAGs (GTDB, Referenced groups)                                                                                         | n° of MAGs | Range Estimated Genome size (Mp) | Range GC (%) | Range median intergenic spacer (bp) | Av. Compl. (%) | Av. Cont. (%) |
|--------------------------|-------------------------------------------------------------------------------------------------------------------------------------------------|------------|----------------------------------|--------------|-------------------------------------|----------------|---------------|
| Patescibacteria          | c_Microgenomatia (3), c_Paceibacteria, c_ABY1 (4), o_Portnoybacterales (2), o_Shapirobacterales (1), o_Paceibacterales (3), o_Paceibacteria (2) | 15         | 0.6-1.69                         | 30-41        | 17-62                               | 58.09          | 1.24          |
| Omnitrophota             | p_Omnitrophota;c_koll11 (13), f_Omnitrophaceae_A (1)                                                                                            | 15         | 0.84-3.78                        | 35-47        | 7-84                                | 70.45          | 1.69          |
| Planctomycetota          | c_Brocadiaceae (1), c_Phycisphaerae (7), o_Pirellulales (2), o_Phycisphaerales (1), f_Pirellulaceae (1), p_Planctomycetota (2)                  | 14         | 1.92-14.18                       | 43-71        | 22-110                              | 72.33          | 1.78          |
| Desulfobacterota         | o_Desulfatiglandales (9), o_Desulfobacterales (4), g_Desulfobacula (1)                                                                          | 14         | 1.98-8.3                         | 40-50        | 53-114                              | 65.95          | 1.69          |
| Marinisomatota           | o_Marinisomatales (5), c_Marinisomatia (2), p_Marinisomatota (6)                                                                                | 13         | 1.6-4.4                          | 34-44        | 10-62                               | 81.18          | 1.20          |
| Chloroflexota            | c_Anaerolineae (3), c_Dehalococcoidia (3), o_Anaerolineales (4), o_Dehalococcoidales (3)                                                        | 13         | 1.45-5.78                        | 48-63        | 32-89                               | 71.59          | 2.14          |
| $\alpha$ -Proteobacteria | o_Rhodospirillales_A (6), f_Magnetospiraceae (1), c_Alphaproteobacteria (4)                                                                     | 11         | 2.59-4.72                        | 53-64        | 24-62                               | 73.51          | 0.98          |
| Nanoarchaeota            | o_Woesearchaeales (5), o_Pacearchaeales (1), c_Nanoarchaeia (3)                                                                                 | 9          | 0.8-1.6                          | 28-36        | 23-70                               | 64.72          | 1.50          |
| Bacteroidota             | s_Chlorobium_A phaeobacteroides (1), c_Ignavibacteria (1), o_Bacteroidales (5), c_Bacteroidia (1)                                               | 8          | 2.46-5 (3.5)                     | 33-49        | 40-81                               | 85.09          | 2.28          |
| $\gamma$ -Proteobacteria | g_Thioglobus_A (2), g_Methylobacter_A (1), g_Acidovorax_D (1), c_Gammaproteobacteria (3)                                                        | 7          | 1.18-5.59                        | 37-64        | 14-67                               | 75.25          | 2.11          |
| Crenarchaeota            | c_Bathyarchaeia (3), g_Nitrosopumilus (3)                                                                                                       | 6          | 1.39-2.92                        | 32-58        | 37-85                               | 65.18          | 0.88          |
| Actinobacteriota         | o_Microtrichiales;f_MedAcidi-G1 (2), p_Actinobacteriota;c_UBA1414 (2)                                                                           | 4          | 1.42-2.33                        | 31-64        | 27-68                               | 76.65          | 1.09          |
| Verrucomicrobiota        | c_Kiritimatiellae (2), o_Kiritimatiellales (2)                                                                                                  | 4          | 2-3.6                            | 53-60        | 45-56                               | 74.04          | 2.53          |
| Aenigmarchaeota          | c_Aenigmarchaeia (3), o_Aenigmarchaeales (1)                                                                                                    | 4          | 0.71-1.29                        | 36-45        | 37-59                               | 55.9           | 1.86          |
| Cloacimonadota           | c_Cloacimonadia (2), o_Cloacimonadales (1)                                                                                                      | 3          | 1.2-2.91                         | 31-36        | 15-50                               | 74.34          | 0.11          |
| Campylobacterota         | f_Arcobacteraceae (1), g_Sulfurimonas (1)                                                                                                       | 2          | 1.14-1.81                        | 30-35        | 9-15                                | 60.01          | 1.04          |
| Nitrospirota             | c_Thermodesulfovibrionia (2)                                                                                                                    | 2          | 1.85-3.18                        | 44-46        | 53-68                               | 68.81          | 0.94          |
| KSB1                     | p_AABM5-125-24 (1), p_KSB1 (1)                                                                                                                  | 2          | 4.05-5.13                        | 37-46        | 94-144                              | 73.31          | 2.2           |
| Myxococcota              | p_Myxococcota (1)                                                                                                                               | 1          | 4.46                             | 63.7         | 37                                  | 60.65          | 0.84          |
| Bdellovibrionota         | f_Bacteriovoracaceae (1)                                                                                                                        | 1          | 4.78                             | 37.2         | 40                                  | 92.41          | 3.63          |
| Spirochaetota            | c_Spirochaetia (1)                                                                                                                              | 1          | 2.92                             | 40.9         | 52                                  | 67.32          | 1.89          |
| Halobacterota            | d_Archaea;p_Halobacterota;c_Syntrophoarchaeia;o_ANME-1 (1)                                                                                      | 1          | 1.81                             | 43.1         | 52                                  | 55.52          | 0.65          |
| Nitrospinota             | f_Nitrospinaceae (1)                                                                                                                            | 1          | 3.08                             | 46           | 69                                  | 93.96          | 2.56          |
| Deinobacteriota          | p_Deinobacteria (1)                                                                                                                             | 1          | 3.002                            | 54           | 45                                  | 64.03          | 1.1           |
| SAR324                   | c_SAR324;o_SAR324 (1)                                                                                                                           | 1          | 2.96                             | 41.7         | 53                                  | 82.86          | 0             |
| SM23                     | d_Bacteria;p_AABM5-125-24 (1)                                                                                                                   | 1          | 3.58                             | 45.1         | 131                                 | 73.63          | 3.3           |
| Acidobacteriota          | f_Aminicenantaceae (1)                                                                                                                          | 1          | 3.0955127                        | 40.5         | 68                                  | 89.52          | 4.27          |

Paranthesis ( ) indicate the average value of each field in case of range values and number of MAGs in bold for each taxonomic affiliation. Taxonomic classification follows GTDB criteria. Marinisomatota includes former Marinimicrobia. Halobacterota includes former Euryarchaeota methanogens group. Campylobacterota includes former Epsilonproteobacteria. d :Domain, p :Phylum, c :Class, o :Order, f :family, g :Genus, s : Species. Av. (Average), Compl. (Completeness), Cont. (Contamination).

768  
769  
770  
771  
772  
773





# Fig. 2

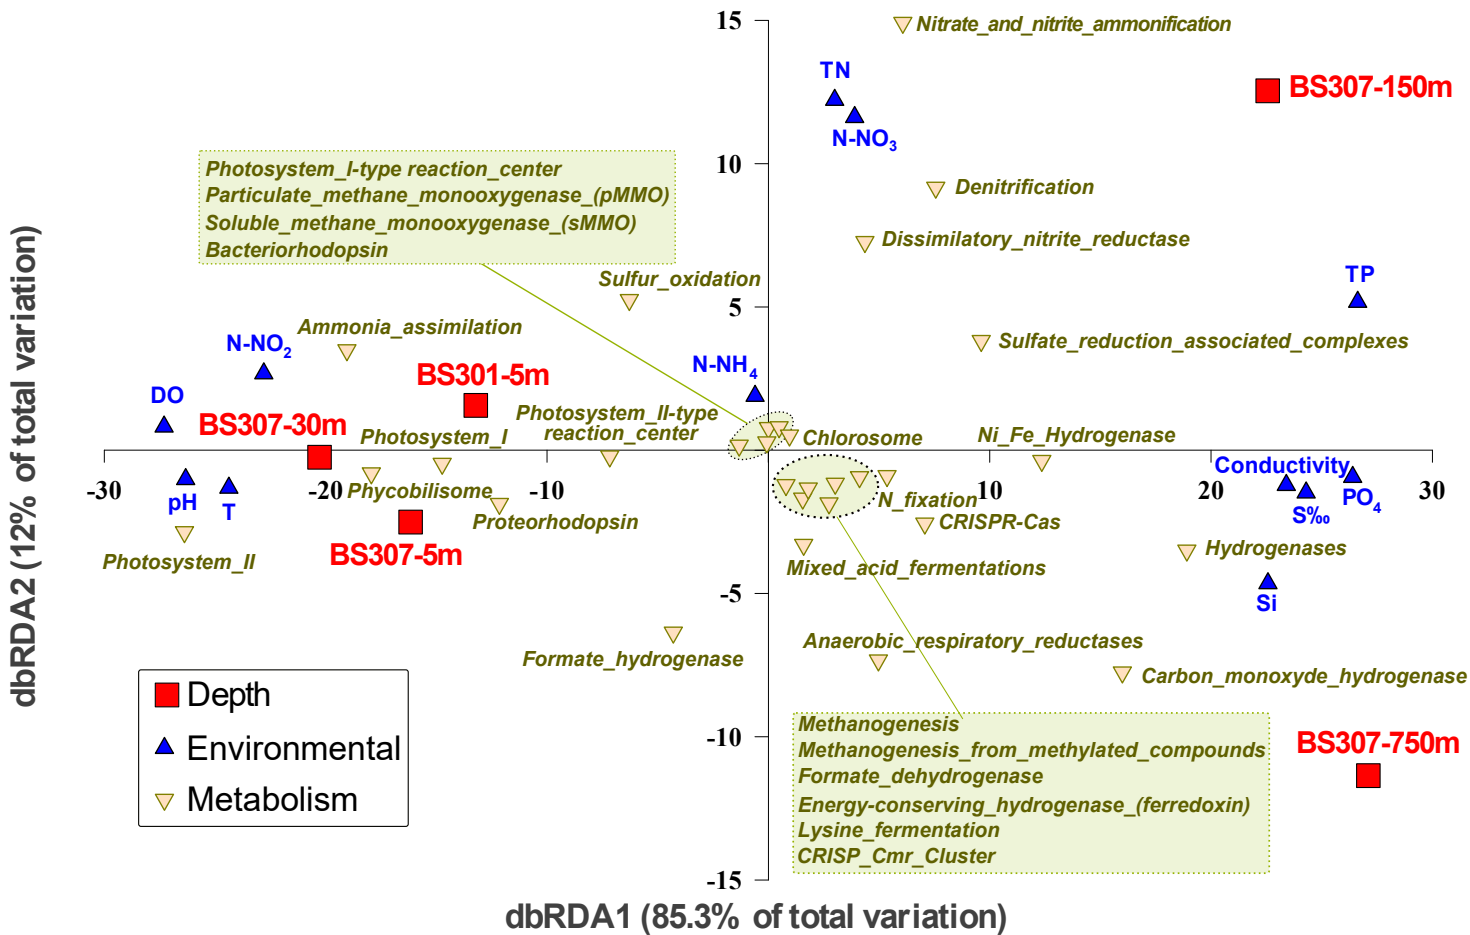

# B

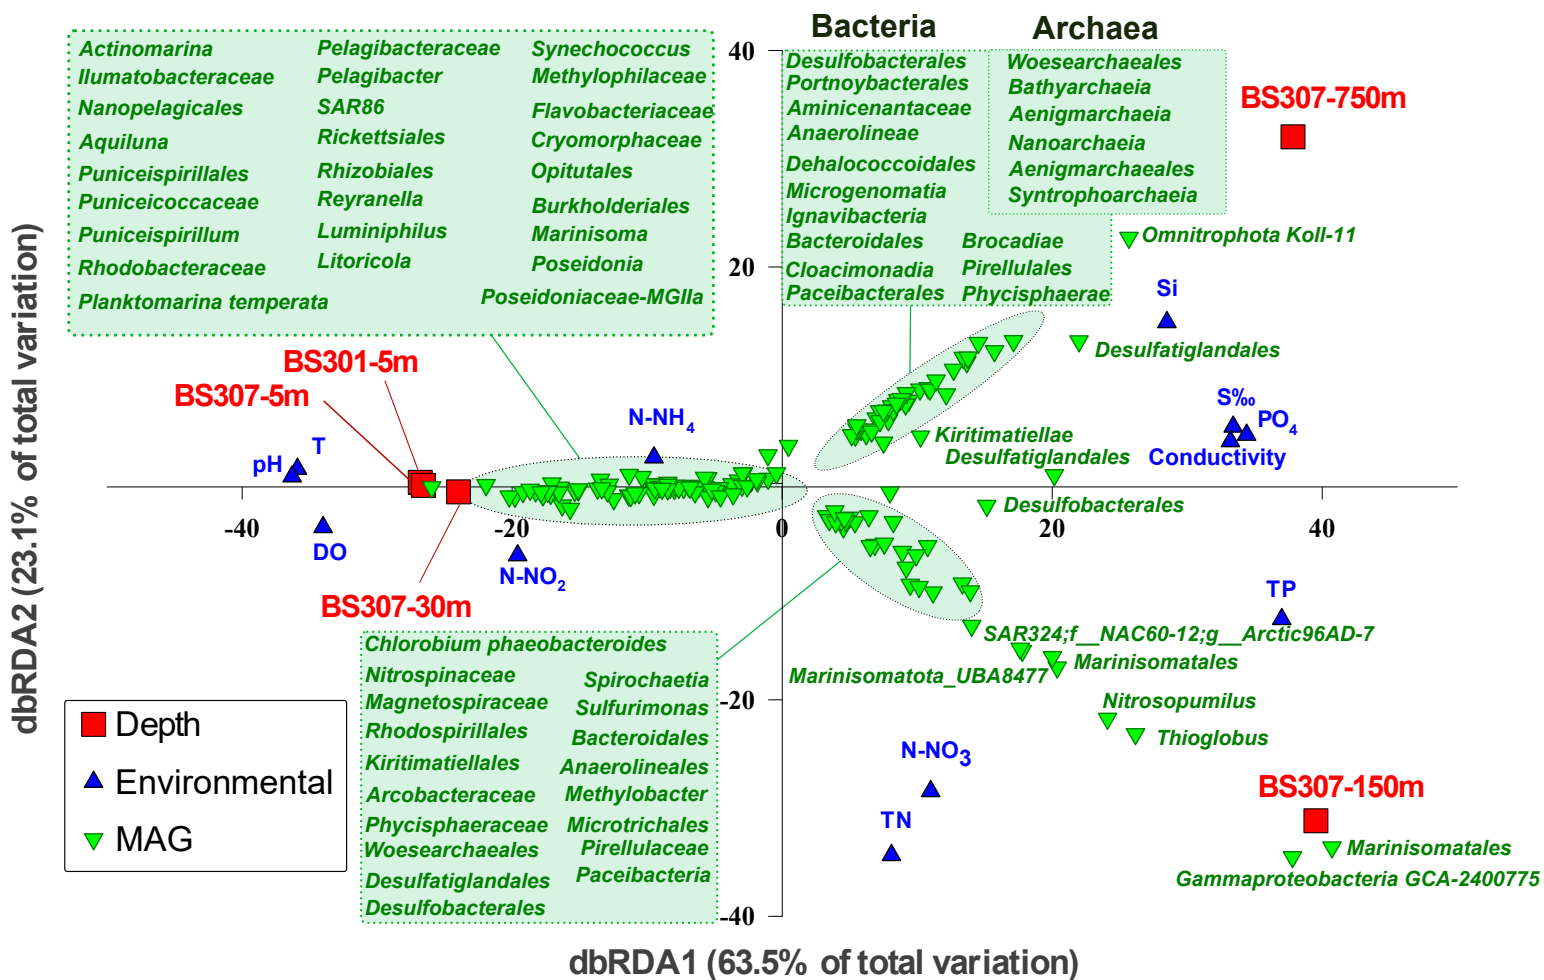

# Fig. 3

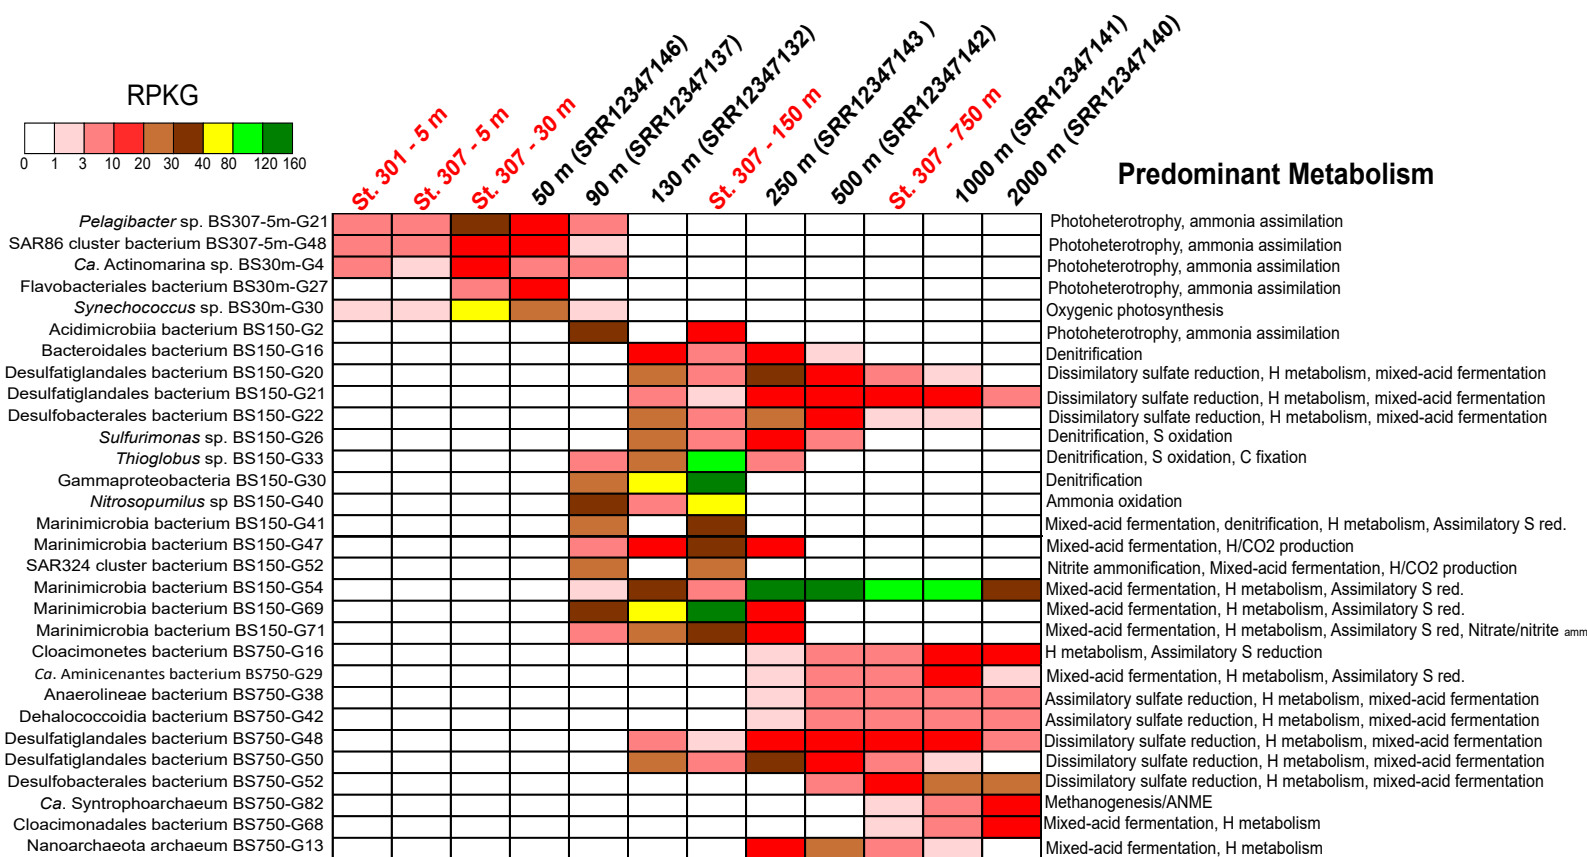

# Fig. S1

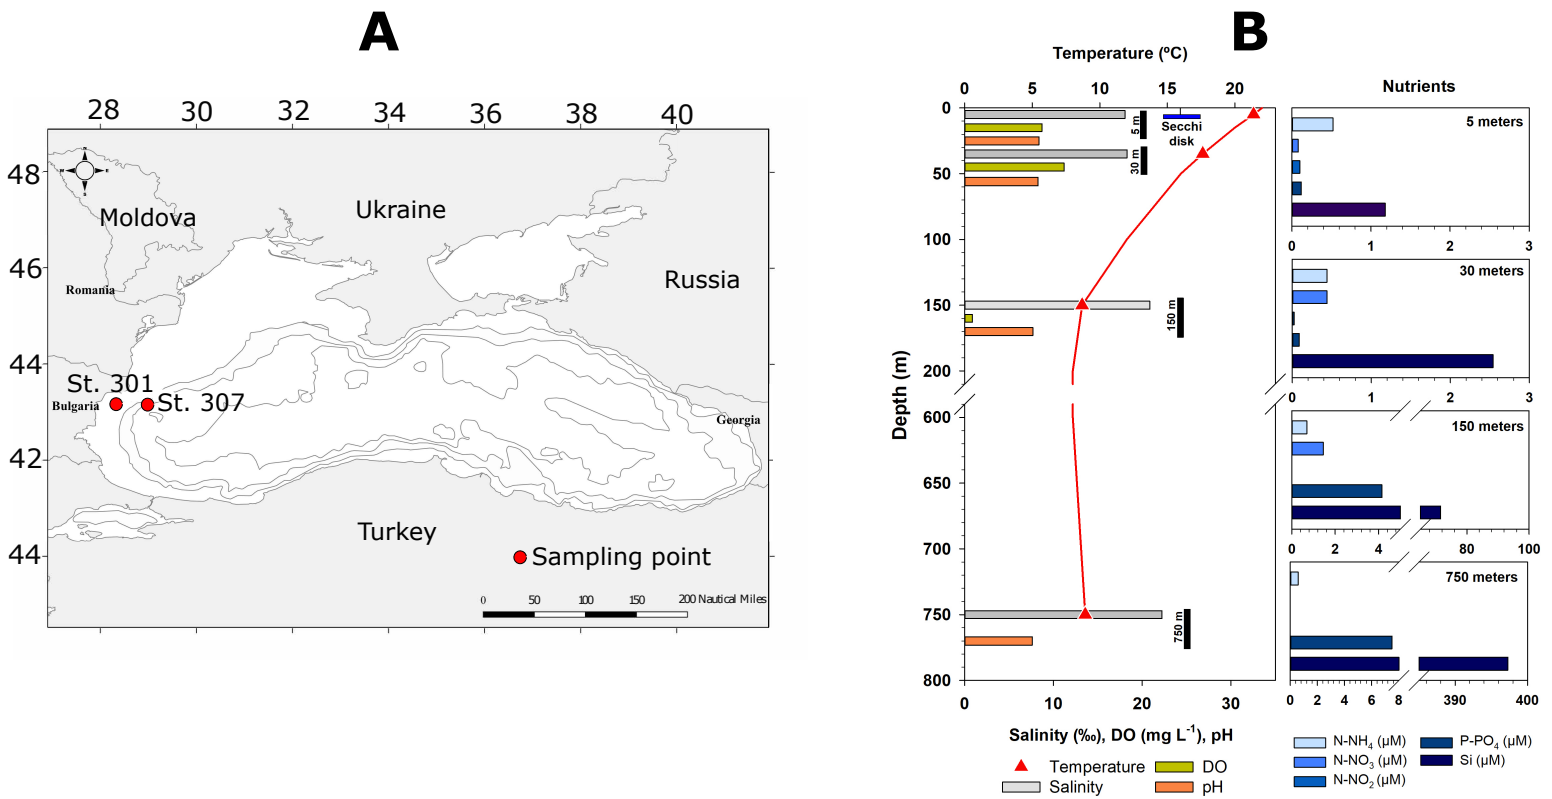

## Fig. S2

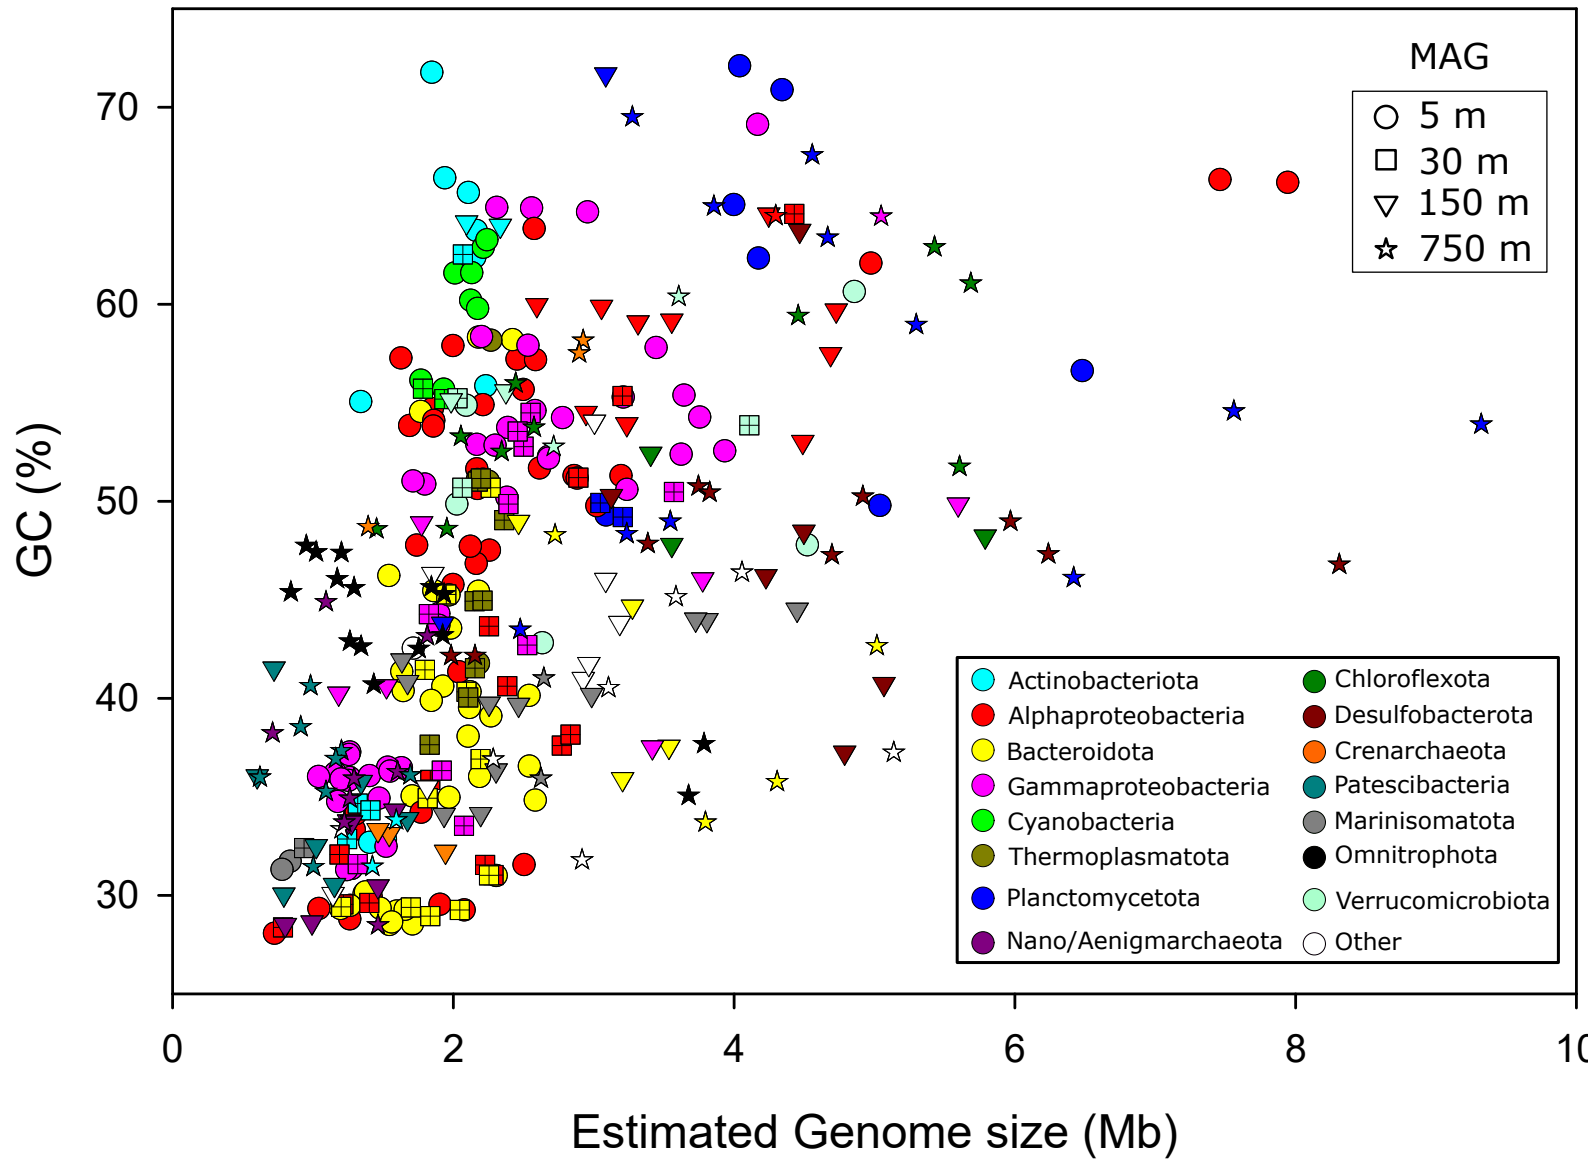

## Fig. S3

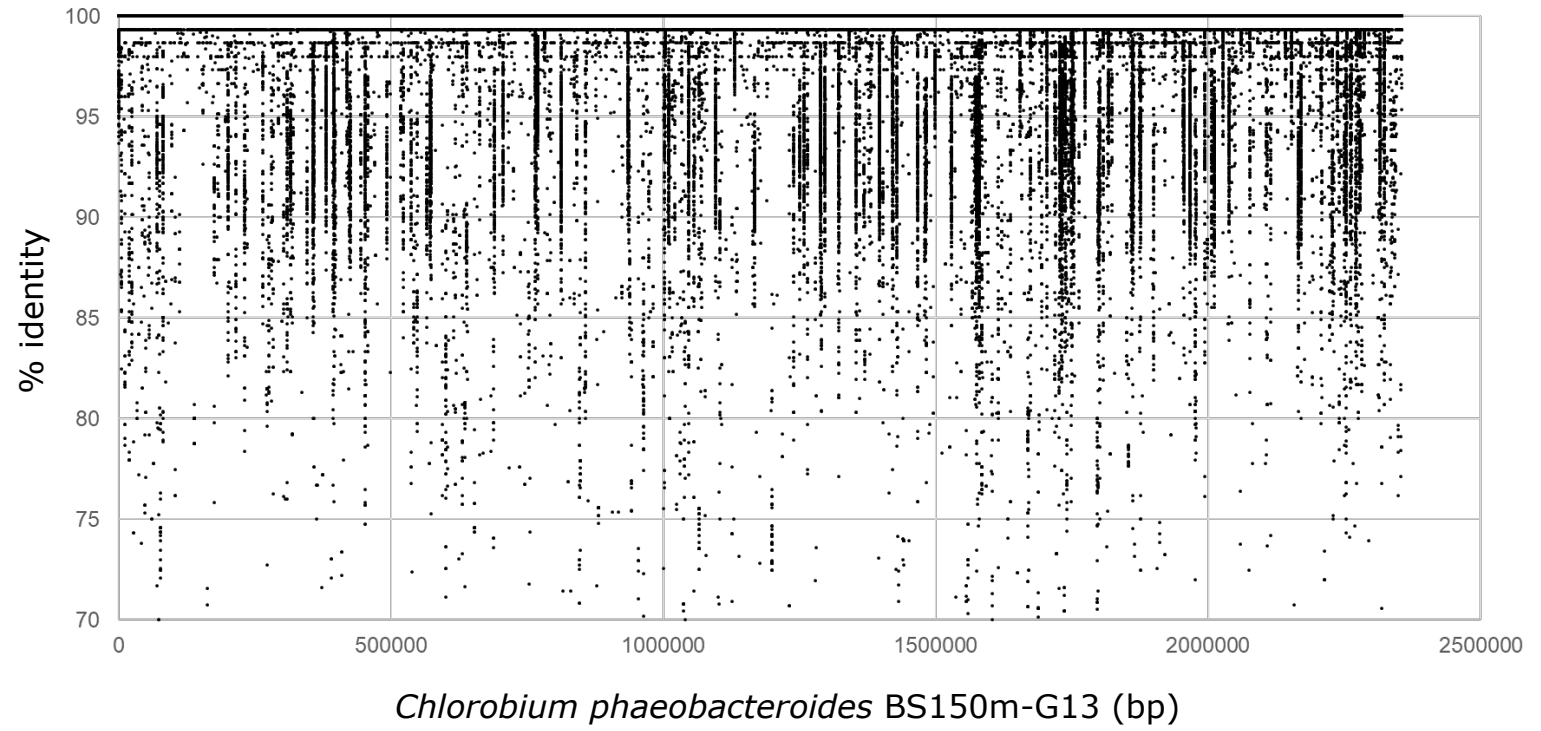

**Fig. S4**

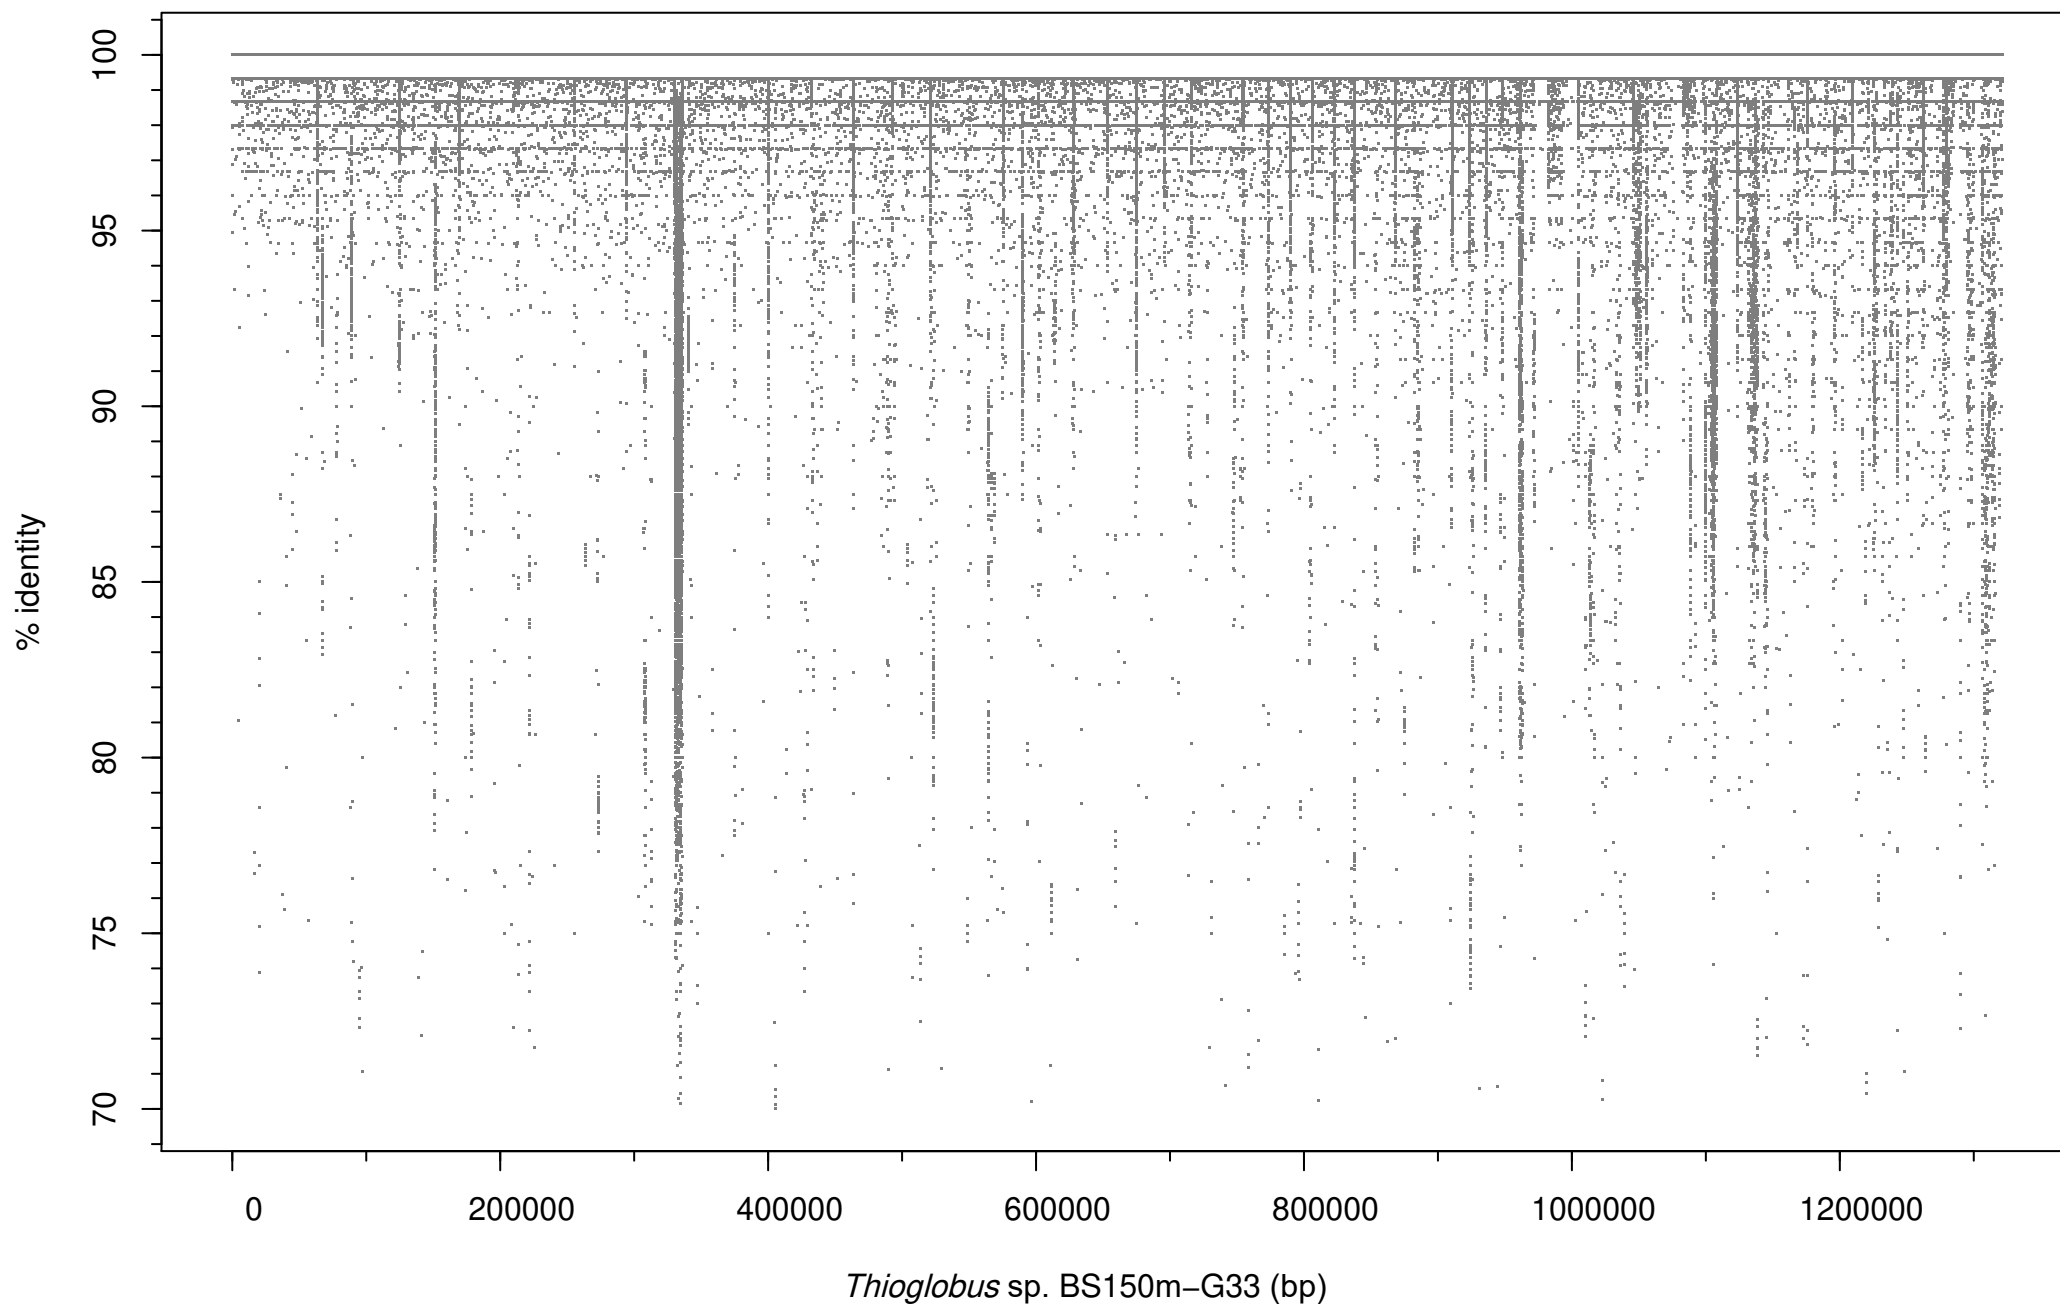

# Fig. S5

# A

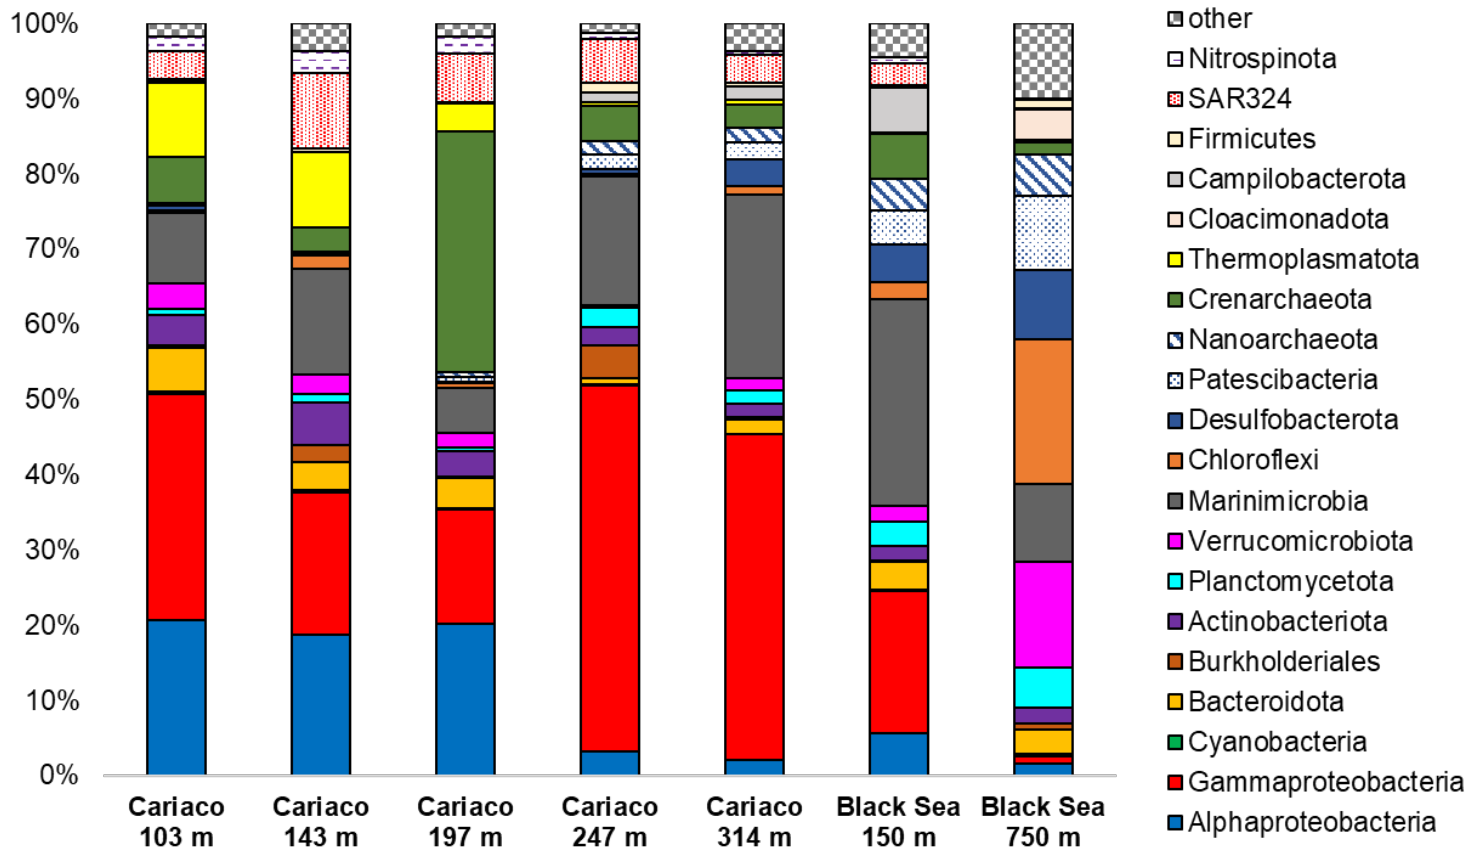

# B

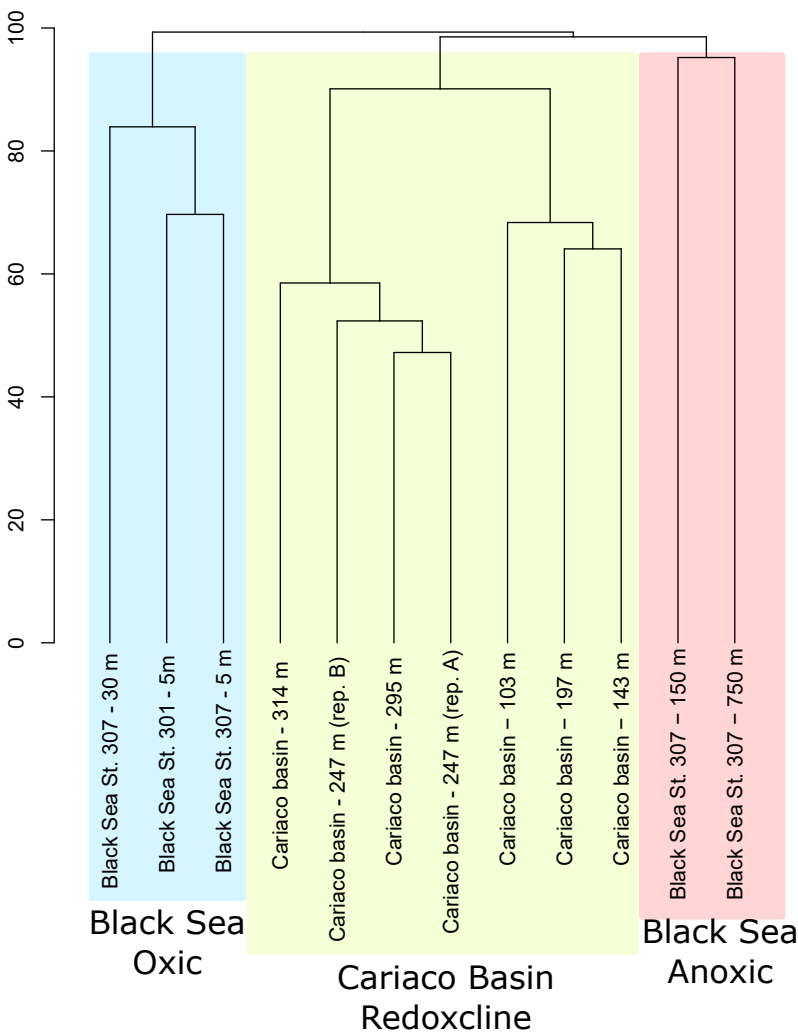

# C

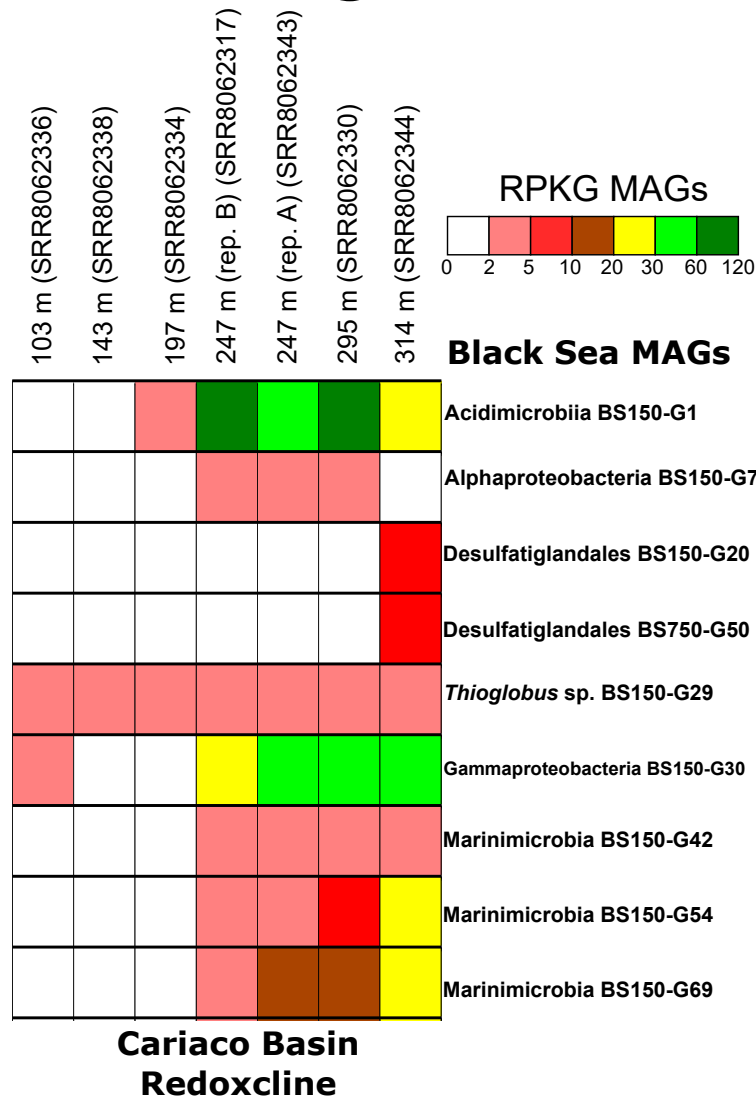

**A**

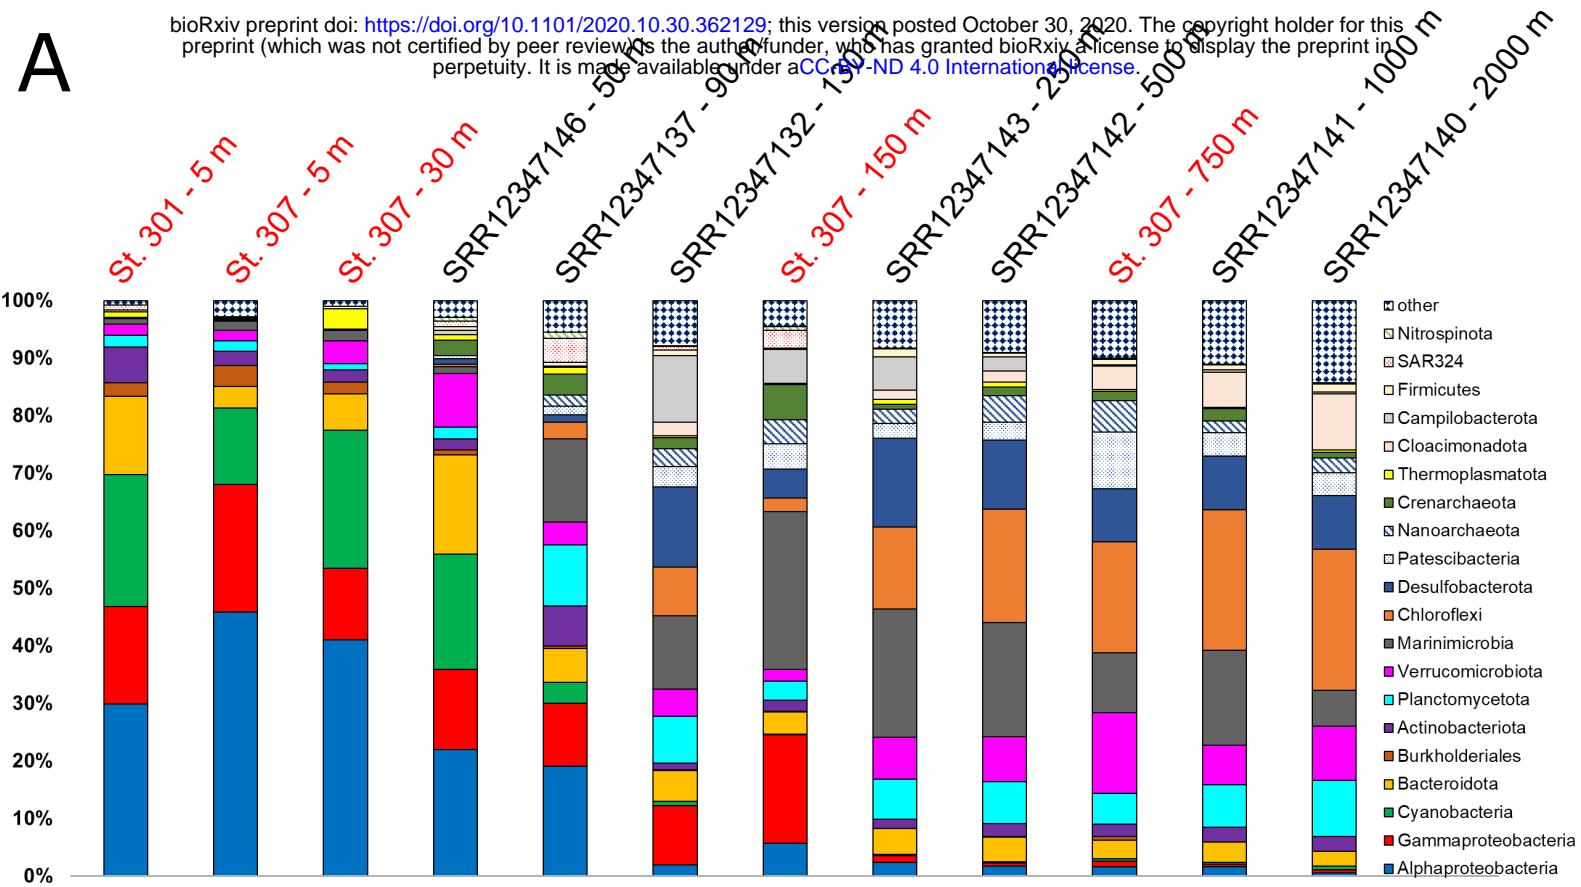

**B**

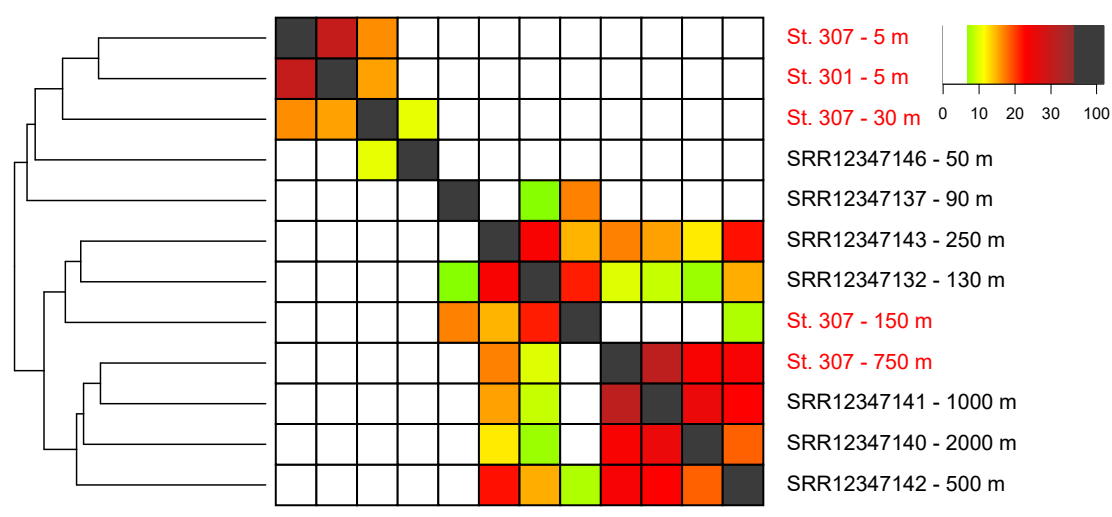

**Fig. S6**
